# Supplementary material for: Copper-catalyzed oxidative coupling reaction of α,β-unsaturated aldehydes with amidines: synthesis of 1,2,4-trisubstituted-1H-imidazole-5-carbaldehydes
Source: Royal Society of Chemistry journal article supplement (doi:10.1039/c5qo00285k), 2015-01-01

## Supporting Information

### Copper-Catalyzed Oxidative Coupling Reaction of $\alpha$ , $\beta$ -Unsaturated Aldehydes with Amidines: Synthesis of 1, 2, 4-trisubstituted-1*H*-Imidazole-5-carbaldehydes

Yaxuan Li,<sup>ab</sup> Yajie Fu,<sup>ab</sup> Chaojie Ren,<sup>ab</sup> Dong Tang,<sup>ab</sup> Ping Wu,<sup>ab</sup> Xu Meng<sup>c</sup> and Baohua Chen<sup>\*ab</sup>

\*E-mail: chbh@lzu.edu.cn

#### Table of Contents

1. General Remarks S02
2. Reference S02
3. Spectral data of the compounds S03-S09
4. <sup>1</sup>H and <sup>13</sup>C NMR spectra of the products S10-S36

## 1. General Remarks

All of the reactions were carried out in oven-dried flask. Flash chromatography was carried out with Merck silica gel 60 (63-200 mesh). Analytical TLC was performed with Merck silica gel 60 F254 plates, and the products were visualized by UV detection. Unless otherwise noted,  $^1\text{H}$  NMR (300 MHz) and  $^{13}\text{C}$  NMR (75 MHz) spectra were recorded in  $\text{CDCl}_3$ . Chemical shifts ( $\delta$ ) are reported in ppm using TMS as internal standard. Melting points were determined on a microscopic apparatus. Copies of  $^1\text{H}$  NMR and  $^{13}\text{C}$  NMR spectra are provided. Commercially available reagents were used without further purification.

## 2. Reference

- (1) Hu, B.; Wang, Z.; Ai, N.; Zheng, J.; Liu, X.-H.; Shan, S.; Wang, Z., *Org. Lett.* **2011**, *13*, 6362-6365.
- (2) Zhu, Y.; Li, C.; Zhang, J.; She, M.; Sun, W.; Wan, K.; Wang, Y.; Yin, B.; Liu, P.; Li, J., *Org. Lett.* **2015**, *17*, 3872–3875.

### 3. Spectral data of the compounds

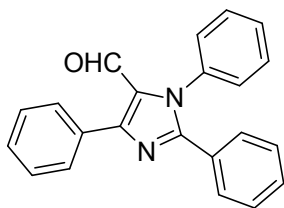

**1, 2, 4-triphenyl-1H-imidazole-5-carbaldehyde (3aa)**<sup>1</sup>: yellow solid (48.6 mg, 75%); m. p. 162-164 °C; <sup>1</sup>H NMR (300 MHz, CDCl<sub>3</sub>) δ 9.82 (s, 1H), 7.94-7.86 (m, 2H), 7.54-7.41 (m, 8H), 7.36-7.21 (m, 5H). <sup>13</sup>C NMR (75 MHz, CDCl<sub>3</sub>) δ 179.5, 153.8, 151.4, 136.6, 132.2, 129.6, 129.4, 129.3, 129.2, 128.7, 128.6, 128.2, 127.8. HRMS (ESI<sup>+</sup>): calcd for C<sub>22</sub>H<sub>17</sub>N<sub>2</sub>O (M+H)<sup>+</sup>: 325.1336; Found: 325.1332.

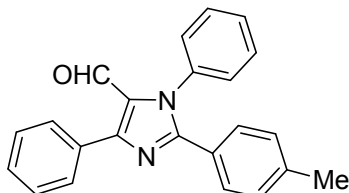

**1, 4-diphenyl-2-(p-tolyl)-1H-imidazole-5-carbaldehyde (3ba)**: yellow crystal (54.1 mg, 80%); m. p. 115-117 °C; <sup>1</sup>H NMR (300 MHz, CDCl<sub>3</sub>) δ 9.79 (s, 1H), 7.94-7.84 (m, 2H), 7.52-7.40 (m, 6H), 7.32 (m, 4H), 7.07-7.01 (m, 2H), 2.28 (s, 3H). <sup>13</sup>C NMR (75 MHz, CDCl<sub>3</sub>) δ 179.4, 153.8, 151.5, 139.8, 136.8, 132.3, 129.3, 129.2, 129.1, 129.0, 128.9, 128.5, 128.4, 127.8, 125.8, 21.2. HRMS (ESI<sup>+</sup>): calcd for C<sub>23</sub>H<sub>19</sub>N<sub>2</sub>O (M+H)<sup>+</sup>: 339.1492; Found: 339.1497.

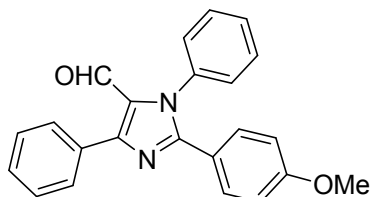

**2-(4-methoxyphenyl)-1,4-diphenyl-1H-imidazole-5-carbaldehyde (3ca)**: yellow solid (58.1 mg, 82%); m. p. 118-120 °C; <sup>1</sup>H NMR (300 MHz, CDCl<sub>3</sub>) δ 9.78 (s, 1H), 7.93-7.85 (m, 2H), 7.53-7.37 (m, 8H), 7.35-7.28 (m, 2H), 6.78-6.72 (m, 2H), 3.74 (s, 3H). <sup>13</sup>C NMR (75 MHz, CDCl<sub>3</sub>) δ 179.3, 160.6, 153.9, 151.4, 136.9, 132.4, 130.7, 129.4, 129.3, 129.2, 128.5, 128.4, 127.8, 121.1, 113.7, 55.2. HRMS (ESI<sup>+</sup>): calcd for C<sub>23</sub>H<sub>19</sub>N<sub>2</sub>O<sub>2</sub> (M+H)<sup>+</sup>: 355.1441; Found: 355.1445.

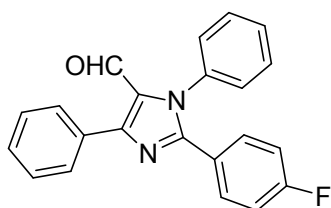

**2-(4-fluorophenyl)-1,4-diphenyl-1H-imidazole-5-carbaldehyde (3da)**: light yellow solid (30.1 mg, 44%); m. p. 138-140 °C; <sup>1</sup>H NMR (300 MHz, CDCl<sub>3</sub>) δ 9.81 (s, 1H), 7.88 (dd, J = 7.9, 1.7 Hz, 2H), 7.55-7.41 (m, 8H), 7.34-7.28 (m, 2H), 6.98-6.90 (m, 2H). <sup>13</sup>C NMR (75 MHz, CDCl<sub>3</sub>) δ 179.5, 163.4 (J = 247.5 Hz), 153.8, 150.5, 136.5, 132.1, 131.3, 131.2, 129.4, 129.3, 129.2, 128.6, 128.5, 127.7, 124.9, 124.8, 115.6, 115.3. HRMS (ESI<sup>+</sup>): calcd for C<sub>22</sub>H<sub>16</sub>FN<sub>2</sub>O (M+H)<sup>+</sup>: 343.1241; Found: 343.1246.

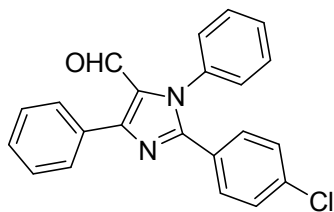

**2-(4-chlorophenyl)-1,4-diphenyl-1H-imidazole-5-carbaldehyde (3ea):** light yellow solid (44.4 mg, 62%); m. p. 150-152 °C;  $^1\text{H}$  NMR (300 MHz,  $\text{CDCl}_3$ )  $\delta$  9.81 (s, 1H), 7.92-7.84 (m, 2H), 7.54-7.43 (m, 6H), 7.42-7.39 (m, 1H), 7.39-7.37 (m, 1H), 7.34-7.28 (m, 2H), 7.24 (t,  $J = 2.7$  Hz, 1H), 7.22-7.19 (m, 1H).  $^{13}\text{C}$  NMR (75 MHz,  $\text{CDCl}_3$ )  $\delta$  179.5, 153.8, 150.2, 136.5, 135.9, 132.1, 130.4, 129.4, 129.3, 128.6, 128.5, 127.7, 127.2. HRMS (ESI $^+$ ): calcd for  $\text{C}_{22}\text{H}_{16}\text{ClN}_2\text{O}$  (M+H) $^+$ : 359.0946; Found: 359.0943.

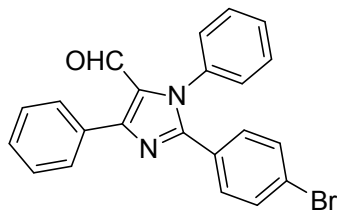

**2-(4-bromophenyl)-1,4-diphenyl-1H-imidazole-5-carbaldehyde (3fa):** yellow solid (44.3 mg, 55%); m. p. 131-133 °C;  $^1\text{H}$  NMR (300 MHz,  $\text{CDCl}_3$ )  $\delta$  9.81 (s, 1H), 7.91-7.84 (m, 2H), 7.54-7.44 (m, 6H), 7.41-7.36 (m, 2H), 7.35-7.28 (m, 4H).  $^{13}\text{C}$  NMR (75 MHz,  $\text{CDCl}_3$ )  $\delta$  179.6, 153.9, 150.3, 136.5, 131.6, 130.7, 129.5, 129.4, 128.7, 128.6, 127.8, 124.4, 120.2. HRMS (ESI $^+$ ): calcd for  $\text{C}_{22}\text{H}_{16}\text{BrN}_2\text{O}$  (M+H) $^+$ : 403.0441; Found: 403.0445.

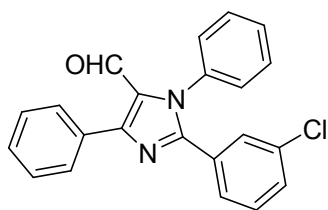

**2-(3-chlorophenyl)-1,4-diphenyl-1H-imidazole-5-carbaldehyde (3ga):** yellow solid (30.8 mg, 43%); m. p. 102-104 °C;  $^1\text{H}$  NMR (300 MHz,  $\text{CDCl}_3$ )  $\delta$  9.83 (s, 1H), 7.94-7.85 (m, 2H), 7.58 (t,  $J = 1.9$  Hz, 1H), 7.56-7.45 (m, 6H), 7.36-7.27 (m, 3H), 7.23 (dt,  $J = 7.9, 1.4$  Hz, 1H), 7.15 (t,  $J = 7.8$  Hz, 1H).  $^{13}\text{C}$  NMR (75 MHz,  $\text{CDCl}_3$ )  $\delta$  179.6, 153.7, 149.8, 136.4, 134.4, 132.1, 130.5, 129.7, 129.6, 129.5, 129.4, 129.3, 128.7, 128.6, 127.7, 127.0. HRMS (ESI $^+$ ): calcd for  $\text{C}_{22}\text{H}_{16}\text{ClN}_2\text{O}$  (M+H) $^+$ : 359.0946; Found: 359.0942.

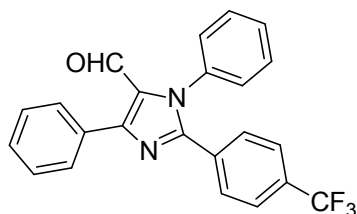

**1,4-diphenyl-2-(4-(trifluoromethyl)phenyl)-1H-imidazole-5-carbaldehyde (3ha):** yellow solid (29.8 mg, 38%); m. p. 128-130 °C;  $^1\text{H}$  NMR (300 MHz,  $\text{CDCl}_3$ )  $\delta$  9.84 (s, 1H), 7.89 (dd,  $J = 7.7, 1.8$  Hz, 2H), 7.62-7.47 (m, 10H), 7.33 (dd,  $J = 7.6, 1.8$  Hz, 2H).  $^{13}\text{C}$  NMR (75 MHz,  $\text{CDCl}_3$ )  $\delta$  179.7, 151.8 ( $J = 307.5$  Hz), 136.3, 132.2, 132.0, 129.7, 129.6, 129.5, 129.4, 128.9, 128.7, 127.7, 125.2, 125.1. HRMS (ESI $^+$ ): calcd for  $\text{C}_{23}\text{H}_{16}\text{F}_3\text{N}_2\text{O}$  (M+H) $^+$ : 393.1209; Found: 393.1207.

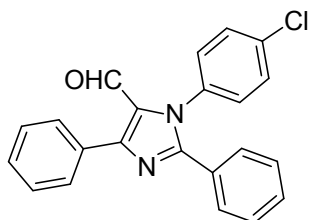

**1-(4-chlorophenyl)-2, 4-diphenyl-1H-imidazole-5-carbaldehyde (3ia):** yellow solid (35.8 mg, 50%); m. p. 130-132 °C;  $^1\text{H}$  NMR (300 MHz,  $\text{CDCl}_3$ )  $\delta$  9.82 (s, 1H), 7.88-7.80 (m, 2H), 7.53-7.37 (m, 7H), 7.36-7.19 (m, 5H).  $^{13}\text{C}$  NMR (75 MHz,  $\text{CDCl}_3$ )  $\delta$  179.5, 154.4, 151.6, 135.2, 135.1, 132.0, 129.8, 129.4, 129.3, 129.2, 129.1, 128.6, 128.3, 128.2. calcd for  $\text{C}_{22}\text{H}_{16}\text{ClN}_2\text{O}$  ( $\text{M}+\text{H}$ ) $^+$ : 359.0946; Found: 359.0944.

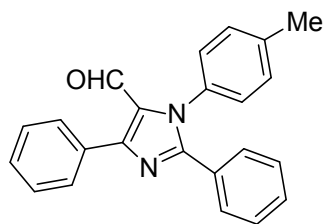

**2, 4-diphenyl-1-(p-tolyl)-1H-imidazole-5-carbaldehyde (3ja):** yellow crystal (54.8 mg, 81%); m. p. 136-138 °C;  $^1\text{H}$  NMR (300 MHz,  $\text{CDCl}_3$ )  $\delta$  9.50 (s, 1H), 7.60 (dd,  $J = 7.8, 1.6$  Hz, 2H), 7.23-7.13 (m, 5H), 7.05-6.85 (m, 7H), 2.12 (s, 3H).  $^{13}\text{C}$  NMR (75 MHz,  $\text{CDCl}_3$ )  $\delta$  179.6, 153.7, 151.4, 139.3, 134.0, 132.4, 130.0, 129.5, 129.4, 129.2, 128.9, 128.5, 128.2, 127.5, 21.3. HRMS ( $\text{ESI}^+$ ): calcd for  $\text{C}_{23}\text{H}_{19}\text{N}_2\text{O}$  ( $\text{M}+\text{H}$ ) $^+$ : 339.1492; Found: 339.1496.

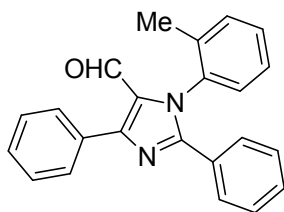

**2, 4-diphenyl-1-(o-tolyl)-1H-imidazole-5-carbaldehyde (3ka):** white solid (41.9 mg, 62%); m. p. 113-115 °C;  $^1\text{H}$  NMR (300 MHz,  $\text{CDCl}_3$ )  $\delta$  9.81 (s, 1H), 7.93 (dd,  $J = 7.8, 1.6$  Hz, 2H), 7.56-7.37 (m, 6H), 7.36-7.20 (m, 6H), 2.04 (s, 3H).  $^{13}\text{C}$  NMR (75 MHz,  $\text{CDCl}_3$ )  $\delta$  179.5, 153.8, 150.9, 136.1, 135.5, 132.3, 131.1, 129.7, 129.6, 129.4, 129.3, 128.9, 128.7, 128.6, 128.3, 128.2, 128.0, 127.0, 17.5. HRMS ( $\text{ESI}^+$ ): calcd for  $\text{C}_{23}\text{H}_{19}\text{N}_2\text{O}$  ( $\text{M}+\text{H}$ ) $^+$ : 339.1492; Found: 339.1495.

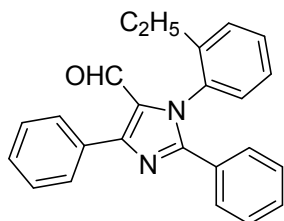

**1-(2-ethylphenyl)-2, 4-diphenyl-1H-imidazole-5-carbaldehyde (3la):** yellow solid (40.1 mg, 57%); m. p. 110-112 °C;  $^1\text{H}$  NMR (300 MHz,  $\text{CDCl}_3$ )  $\delta$  9.79 (s, 1H), 7.95 (dd,  $J = 7.9, 1.7$  Hz, 2H), 7.55-7.44 (m, 6H), 7.41-7.28 (m, 4H), 7.28-7.21 (m, 2H), 2.43-2.20 (m, 2H), 1.02 (t,  $J = 7.6$  Hz, 3H).  $^{13}\text{C}$  NMR (75 MHz,  $\text{CDCl}_3$ )  $\delta$  179.4, 153.5, 151.0, 140.8, 135.5, 132.3, 129.9, 129.7, 129.3, 129.2, 128.8, 128.7, 128.5, 128.3, 128.1, 126.9, 23.4, 13.3. HRMS ( $\text{ESI}^+$ ): calcd for  $\text{C}_{24}\text{H}_{21}\text{N}_2\text{O}$  ( $\text{M}+\text{H}$ ) $^+$ : 353.1649; Found: 353.1645.

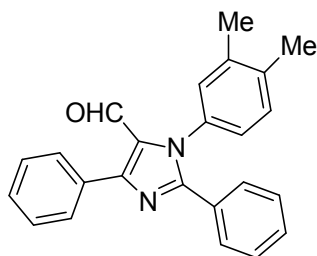

**1-(3,4-dimethylphenyl)-2,4-diphenyl-1H-imidazole-5-carbaldehyde (3ma):** yellow solid (57.7 mg, 82%); m. p. 138-140 °C;  $^1\text{H}$  NMR (300 MHz,  $\text{CDCl}_3$ )  $\delta$  9.77 (s, 1H), 7.96-7.88 (m, 2H), 7.53-7.42 (m, 5H), 7.34-7.16 (m, 4H), 7.10-7.00 (m, 2H), 2.32 (s, 3H), 2.26 (s, 3H).  $^{13}\text{C}$  NMR (75 MHz,  $\text{CDCl}_3$ )  $\delta$  179.6, 153.3, 151.2, 138.0, 137.9, 134.1, 132.4, 130.4, 129.5, 129.3, 129.1, 129.0, 128.7, 128.5, 128.4, 128.2, 125.0, 19.8, 19.6. HRMS (ESI $^+$ ): calcd for  $\text{C}_{24}\text{H}_{21}\text{N}_2\text{O}$  (M+H) $^+$ : 353.1649; Found: 353.1652.

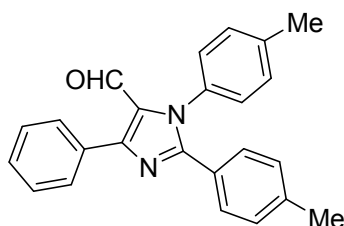

**4-phenyl-1,2-di-p-tolyl-1H-imidazole-5-carbaldehyde (3na):** yellow solid (62 mg, 88%); m. p. 135-137 °C;  $^1\text{H}$  NMR (300 MHz,  $\text{CDCl}_3$ )  $\delta$  9.78 (s, 1H), 7.89 (dd,  $J$  = 7.9, 1.6 Hz, 2H), 7.52-7.42 (m, 3H), 7.37 (d,  $J$  = 8.3 Hz, 2H), 7.27-7.15 (m, 4H), 7.05 (d,  $J$  = 8.0 Hz, 2H), 2.42 (s, 3H), 2.29 (s, 3H).  $^{13}\text{C}$  NMR (75 MHz,  $\text{CDCl}_3$ )  $\delta$  179.4, 153.7, 151.5, 139.7, 139.2, 134.1, 132.4, 129.9, 129.3, 129.0, 128.9, 128.5, 127.4, 125.9, 21.3. HRMS (ESI $^+$ ): calcd for  $\text{C}_{24}\text{H}_{21}\text{N}_2\text{O}$  (M+H) $^+$ : 353.1649; Found: 353.1651.

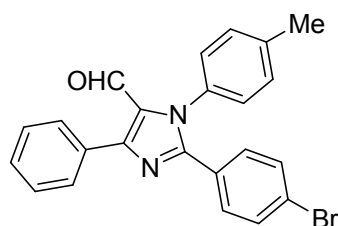

**2-(4-bromophenyl)-4-phenyl-1-(p-tolyl)-1H-imidazole-5-carbaldehyde (3oa):** yellow solid (50.7 mg, 61%); m. p. 145-147 °C;  $^1\text{H}$  NMR (300 MHz,  $\text{CDCl}_3$ )  $\delta$  9.79 (s, 1H), 7.87 (dd,  $J$  = 7.8, 1.7 Hz, 2H), 7.54-7.43 (m, 3H), 7.42-7.31 (m, 4H), 7.26 (d,  $J$  = 8.9 Hz, 2H), 7.18 (d,  $J$  = 8.3 Hz, 2H), 2.43 (s, 3H).  $^{13}\text{C}$  NMR (75 MHz,  $\text{CDCl}_3$ )  $\delta$  179.5, 153.6, 150.2, 139.6, 133.8, 132.1, 131.5, 130.6, 130.1, 129.3, 129.3, 128.7, 128.6, 127.8, 127.4, 124.2, 21.3. HRMS (ESI $^+$ ): calcd for  $\text{C}_{23}\text{H}_{18}\text{BrN}_2\text{O}$  (M+H) $^+$ : 417.0597; Found: 417.0593.

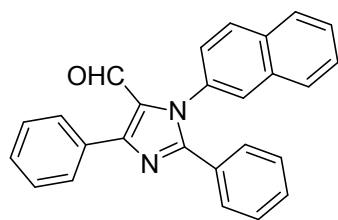

**1-(naphthalen-2-yl)-2,4-diphenyl-1H-imidazole-5-carbaldehyde (3pa):** brown solid (37.4 mg, 50%); m. p. 136-138 °C;  $^1\text{H}$  NMR (300 MHz,  $\text{CDCl}_3$ )  $\delta$  9.84 (s, 1H), 7.94 (t,  $J$  = 8.3 Hz, 4H), 7.78 (d,  $J$  = 10.6 Hz, 2H), 7.61-7.43 (m, 8H), 7.31-7.15 (m, 3H).  $^{13}\text{C}$  NMR (75 MHz,  $\text{CDCl}_3$ )  $\delta$  179.6, 153.9, 151.7,

134.1, 133.0, 132.4, 129.7, 129.5, 129.4, 129.3, 129.2, 128.9, 128.8, 128.6, 128.3, 128.2, 128.0, 127.2, 127.0, 126.6, 125.5. HRMS (ESI<sup>+</sup>): calcd for C<sub>26</sub>H<sub>19</sub>N<sub>2</sub>O (M+H)<sup>+</sup>: 375.1492; Found: 375.1490.

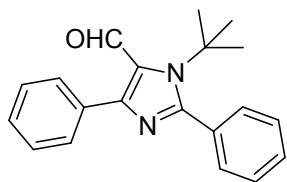

**1-(tert-butyl)-2,4-diphenyl-1H-imidazole-5-carbaldehyde (3qa):** white solid (18.8 mg, 31%); m. p. 126-128 °C; <sup>1</sup>H NMR (300 MHz, CDCl<sub>3</sub>) δ 9.70 (s, 1H), 7.70-7.64 (m, 2H), 7.53-7.48 (m, 2H), 7.48-7.39 (m, 6H), 1.60 (s, 9H). <sup>13</sup>C NMR (75 MHz, CDCl<sub>3</sub>) δ 180.7, 159.4, 154.7, 134.5, 132.8, 130.2, 129.5, 129.3, 129.1, 128.3, 128.1, 61.1, 31.6. HRMS (ESI<sup>+</sup>): calcd for C<sub>20</sub>H<sub>21</sub>N<sub>2</sub>O (M+H)<sup>+</sup>: 305.1649; Found: 305.1652.

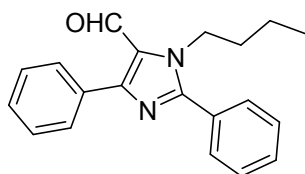

**1-butyl-2,4-diphenyl-1H-imidazole-5-carbaldehyde (3ra):** yellow solid (17.0 mg, 28%); m. p. 66-68 °C; <sup>1</sup>H NMR (300 MHz, CDCl<sub>3</sub>) δ 9.90 (s, 1H), 7.70 (ddd, J = 20.6, 7.0, 2.2 Hz, 4H), 7.58-7.40 (m, 6H), 4.45-4.32 (m, 2H), 1.76 (dt, J = 15.2, 7.5 Hz, 2H), 1.31-1.23 (m, 2H), 0.86 (t, J = 7.4 Hz, 3H). <sup>13</sup>C NMR (75 MHz, CDCl<sub>3</sub>) δ 180.7, 155.6, 152.9, 132.7, 132.5, 129.9, 129.5, 129.4, 129.0, 128.7, 128.6, 126.9, 46.4, 33.2, 19.6, 13.5. HRMS (ESI<sup>+</sup>): calcd for C<sub>20</sub>H<sub>21</sub>N<sub>2</sub>O (M+H)<sup>+</sup>: 305.1649; Found: 305.1655.

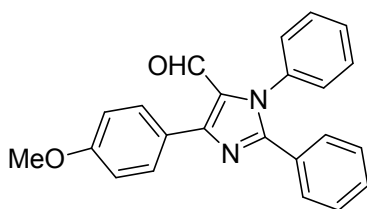

**4-(4-methoxyphenyl)-1,2-diphenyl-1H-imidazole-5-carbaldehyde (3ab):** light yellow solid (53.1 mg, 75%); m. p. 128-130 °C; <sup>1</sup>H NMR (300 MHz, CDCl<sub>3</sub>) δ 9.77 (s, 1H), 7.93-7.84 (m, 2H), 7.51-7.39 (m, 5H), 7.35-7.20 (m, 5H), 7.06-6.99 (m, 2H), 3.86 (s, 3H). <sup>13</sup>C NMR (75 MHz, CDCl<sub>3</sub>) δ 179.4, 160.5, 153.5, 151.2, 136.6, 130.7, 129.5, 129.3, 129.2, 128.8, 128.2, 127.8, 124.8, 114.0, 55.3. HRMS (ESI<sup>+</sup>): calcd for C<sub>23</sub>H<sub>19</sub>N<sub>2</sub>O<sub>2</sub> (M+H)<sup>+</sup>: 355.1441; Found: 355.1443.

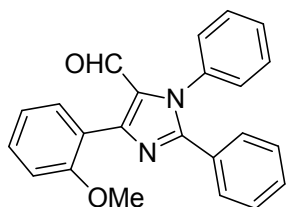

**4-(2-methoxyphenyl)-1,2-diphenyl-1H-imidazole-5-carbaldehyde (3ac):** light yellow solid (61.6 mg, 87%); m. p. 163-165 °C; <sup>1</sup>H NMR (300 MHz, CDCl<sub>3</sub>) δ 9.69 (s, 1H), 7.69 (dd, J = 7.5, 1.7 Hz, 1H), 7.51-7.37 (m, 6H), 7.37-7.16 (m, 5H), 7.10 (t, J = 7.3 Hz, 1H), 7.01 (d, J = 8.3 Hz, 1H), 3.83 (s, 3H). <sup>13</sup>C NMR (75 MHz, CDCl<sub>3</sub>) δ 180.1, 156.7, 151.5, 150.2, 136.9, 129.3, 129.2, 129.1, 129.0, 128.1, 127.7, 121.5, 120.9, 111.0, 55.5. HRMS (ESI<sup>+</sup>): calcd for C<sub>23</sub>H<sub>19</sub>N<sub>2</sub>O<sub>2</sub> (M+H)<sup>+</sup>: 355.1441; Found: 355.1445.

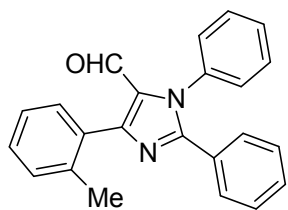

**1, 2-diphenyl-4-(*o*-tolyl)-1*H*-imidazole-5-carbaldehyde (3ad)**: yellow solid (51.4 mg, 76%); m. p. 152-154 °C; <sup>1</sup>H NMR (300 MHz, CDCl<sub>3</sub>) δ 9.54 (s, 1H), 7.51-7.43 (m, 6H), 7.38-7.21 (m, 8H), 2.49 (s, 3H). <sup>13</sup>C NMR (75 MHz, CDCl<sub>3</sub>) δ 179.3, 155.0, 151.0, 137.6, 136.6, 131.4, 131.2, 130.6, 129.6, 129.2, 129.1, 129.0, 128.7, 128.2, 127.7, 125.5, 20.4. HRMS (ESI<sup>+</sup>): calcd for C<sub>23</sub>H<sub>19</sub>N<sub>2</sub>O (M+H)<sup>+</sup>: 339.1492; Found: 339.1490.

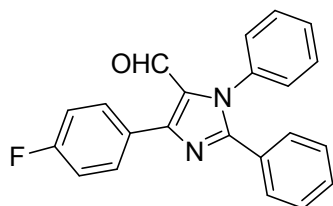

**4-(4-fluorophenyl)-1, 2-diphenyl-1*H*-imidazole-5-carbaldehyde (3ae)**: yellow solid (44.5 mg, 65%); m. p. 151-152 °C; <sup>1</sup>H NMR (300 MHz, CDCl<sub>3</sub>) δ 9.74 (s, 1H), 8.00-7.92 (m, 2H), 7.51-7.42 (m, 5H), 7.26 (dddd, J = 17.4, 15.3, 7.0, 2.9 Hz, 7H). <sup>13</sup>C NMR (75 MHz, CDCl<sub>3</sub>) δ 179.3, 163.5 (J=247.5 Hz), 152.2, 151.3, 136.4, 131.3, 131.2, 129.7, 129.4, 129.2, 128.7, 128.5, 128.3, 127.9, 115.7, 115.4. HRMS (ESI<sup>+</sup>): calcd for C<sub>22</sub>H<sub>16</sub>FN<sub>2</sub>O (M+H)<sup>+</sup>: 343.1241; Found: 343.1245.

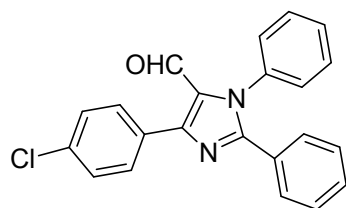

**4-(4-chlorophenyl)-1, 2-diphenyl-1*H*-imidazole-5-carbaldehyde (3af)**: yellow solid (40.8 mg, 57%); m. p. 159-161 °C; <sup>1</sup>H NMR (300 MHz, CDCl<sub>3</sub>) δ 9.75 (s, 1H), 7.93 (d, J = 8.5 Hz, 2H), 7.52-7.41 (m, 7H), 7.36-7.21 (m, 5H). <sup>13</sup>C NMR (75 MHz, CDCl<sub>3</sub>) δ 179.2, 151.7, 151.3, 136.3, 135.4, 130.8, 130.6, 129.7, 129.5, 129.2, 128.7, 128.6, 128.5, 128.3, 127.9. HRMS (ESI<sup>+</sup>): calcd for C<sub>22</sub>H<sub>16</sub>ClN<sub>2</sub>O (M+H)<sup>+</sup>: 359.0946; Found: 359.0948.

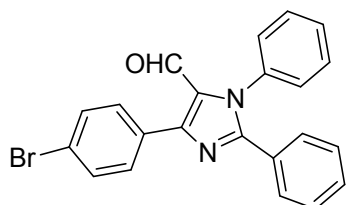

**4-(4-bromophenyl)-1, 2-diphenyl-1*H*-imidazole-5-carbaldehyde (3ag)**: yellow solid (50.8 mg, 63%); m. p. 172-174 °C; <sup>1</sup>H NMR (300 MHz, CDCl<sub>3</sub>) δ 9.75 (s, 1H), 7.90-7.82 (m, 2H), 7.66-7.60 (m, 2H), 7.52-7.42 (m, 5H), 7.37-7.22 (m, 5H). <sup>13</sup>C NMR (75 MHz, CDCl<sub>3</sub>) δ 179.2, 151.8, 151.4, 136.4, 131.7, 131.3, 130.8, 129.8, 129.5, 129.2, 128.7, 128.6, 128.3, 127.9, 123.7, 110.1. HRMS (ESI<sup>+</sup>): calcd for C<sub>22</sub>H<sub>16</sub>BrN<sub>2</sub>O (M+H)<sup>+</sup>: 403.0441; Found: 403.0446.



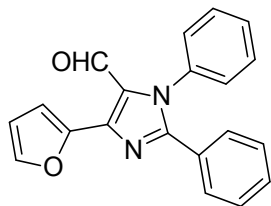

**4-(furan-2-yl)-1,2-diphenyl-1H-imidazole-5-carbaldehyde (3ai):** yellow solid (22.6 mg, 36%); m. p. 130-132 °C;  $^1\text{H}$  NMR (300 MHz,  $\text{CDCl}_3$ )  $\delta$  10.15 (s, 1H), 7.60 (dd,  $J = 1.8, 0.7$  Hz, 1H), 7.44 (ddt,  $J = 7.0, 3.8, 2.5$  Hz, 5H), 7.34-7.21 (m, 6H), 6.58 (dd,  $J = 3.5, 1.8$  Hz, 1H).  $^{13}\text{C}$  NMR (75 MHz,  $\text{CDCl}_3$ )  $\delta$  179.7, 151.9, 148.3, 144.0, 142.7, 136.5, 129.7, 129.4, 129.3, 129.2, 128.5, 128.2, 128.0, 127.9, 111.8, 111.6. HRMS (ESI $^+$ ): calcd for  $\text{C}_{20}\text{H}_{15}\text{N}_2\text{O}_2$  (M+H) $^+$ : 315.1128; Found: 315.1132.

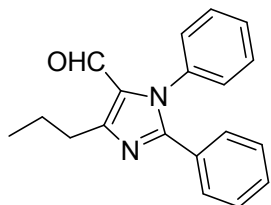

**1,2-diphenyl-4-propyl-1H-imidazole-5-carbaldehyde (3aj):** light yellow solid (19.7 mg, 34%); m. p. 82-84 °C;  $^1\text{H}$  NMR (300 MHz,  $\text{CDCl}_3$ )  $\delta$  9.65 (s, 1H), 7.51-7.36 (m, 5H), 7.33-7.19 (m, 5H), 2.98 (dd,  $J = 8.6, 6.8$  Hz, 2H), 1.93-1.79 (m, 2H), 1.07 (t,  $J = 7.4$  Hz, 3H).  $^{13}\text{C}$  NMR (75 MHz,  $\text{CDCl}_3$ )  $\delta$  178.6, 155.5, 150.5, 136.2, 129.4, 129.3, 129.0, 128.9, 128.2, 127.9, 30.1, 23.0, 14.0. HRMS (ESI $^+$ ): calcd for  $\text{C}_{19}\text{H}_{19}\text{N}_2\text{O}$  (M+H) $^+$ : 291.1492; Found: 291.1496.

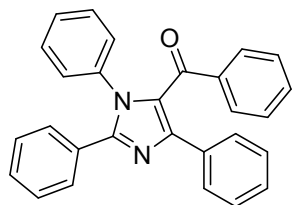

**phenyl(1,2,4-triphenyl-1H-imidazol-5-yl)methanone (3ak)**<sup>2</sup>: yellow solid (56.0 mg, 70%); m. p. 194-196 °C;  $^1\text{H}$  NMR (300 MHz,  $\text{CDCl}_3$ )  $\delta$  7.74-7.65 (m, 2H), 7.53-7.43 (m, 4H), 7.39-7.09 (m, 14H).  $^{13}\text{C}$  NMR (75 MHz,  $\text{CDCl}_3$ )  $\delta$  187.6, 149.6, 146.5, 137.6, 136.9, 133.3, 132.9, 129.8, 129.4, 129.1, 129.0, 128.9, 128.8, 128.7, 128.4, 128.1, 128.0, 127.9, 127.7, 127.5. HRMS (ESI $^+$ ): calcd for  $\text{C}_{28}\text{H}_{21}\text{N}_2\text{O}$  (M+H) $^+$ : 401.1649; Found: 401.1654.

#### 4. <sup>1</sup>H and <sup>13</sup>C NMR spectra

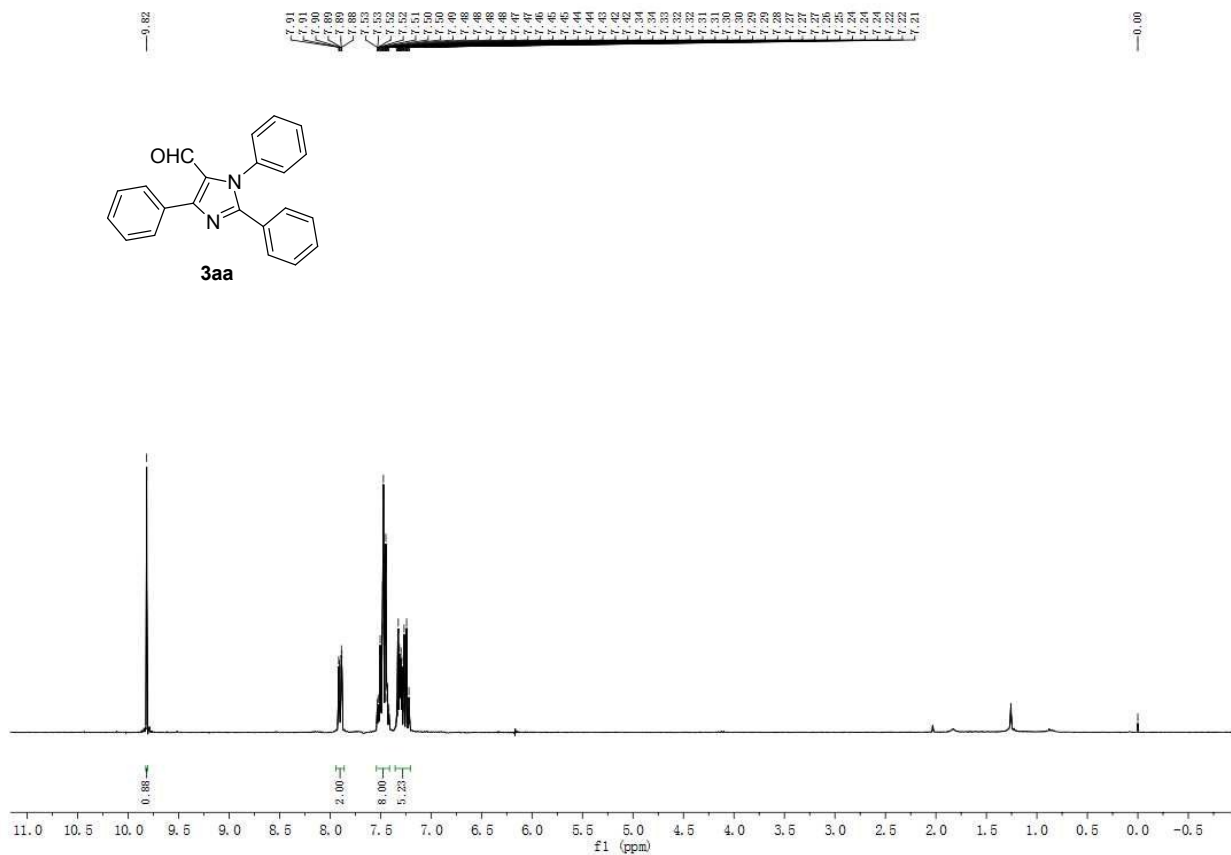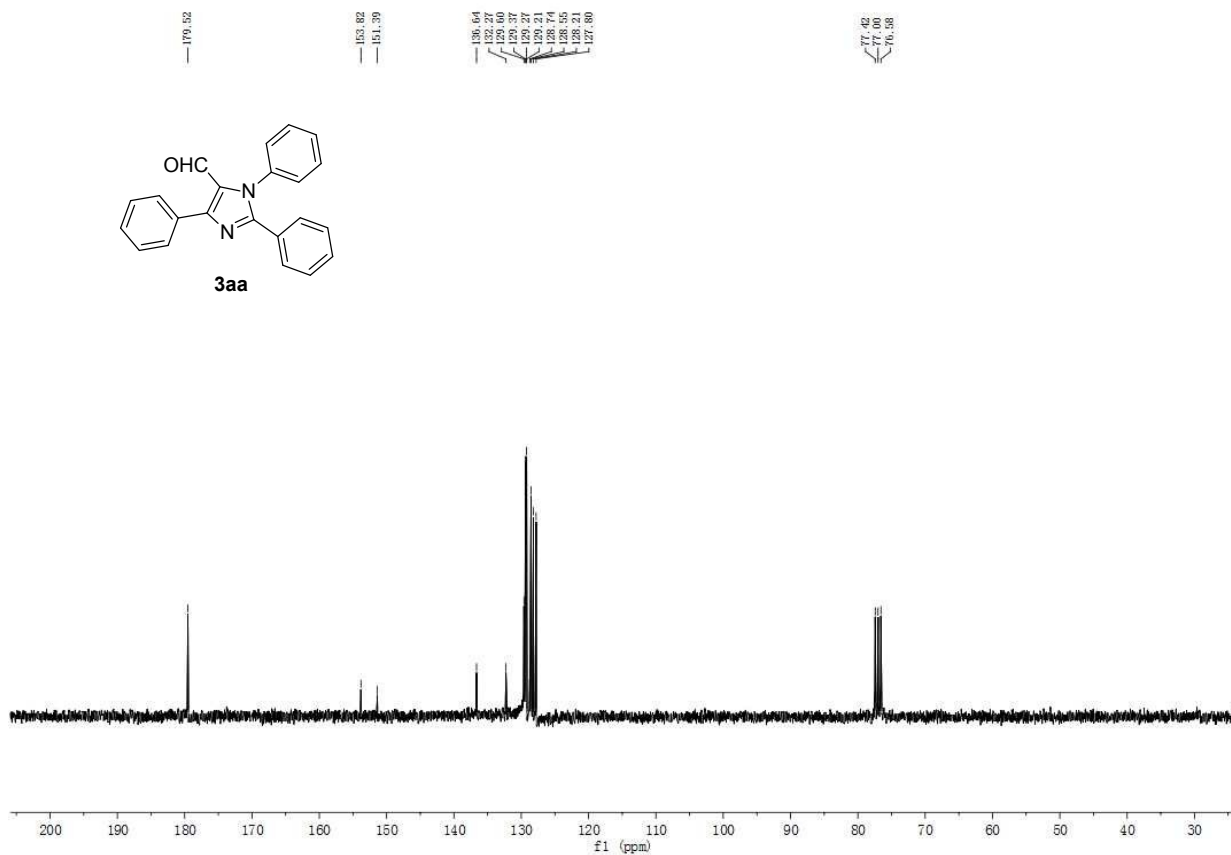

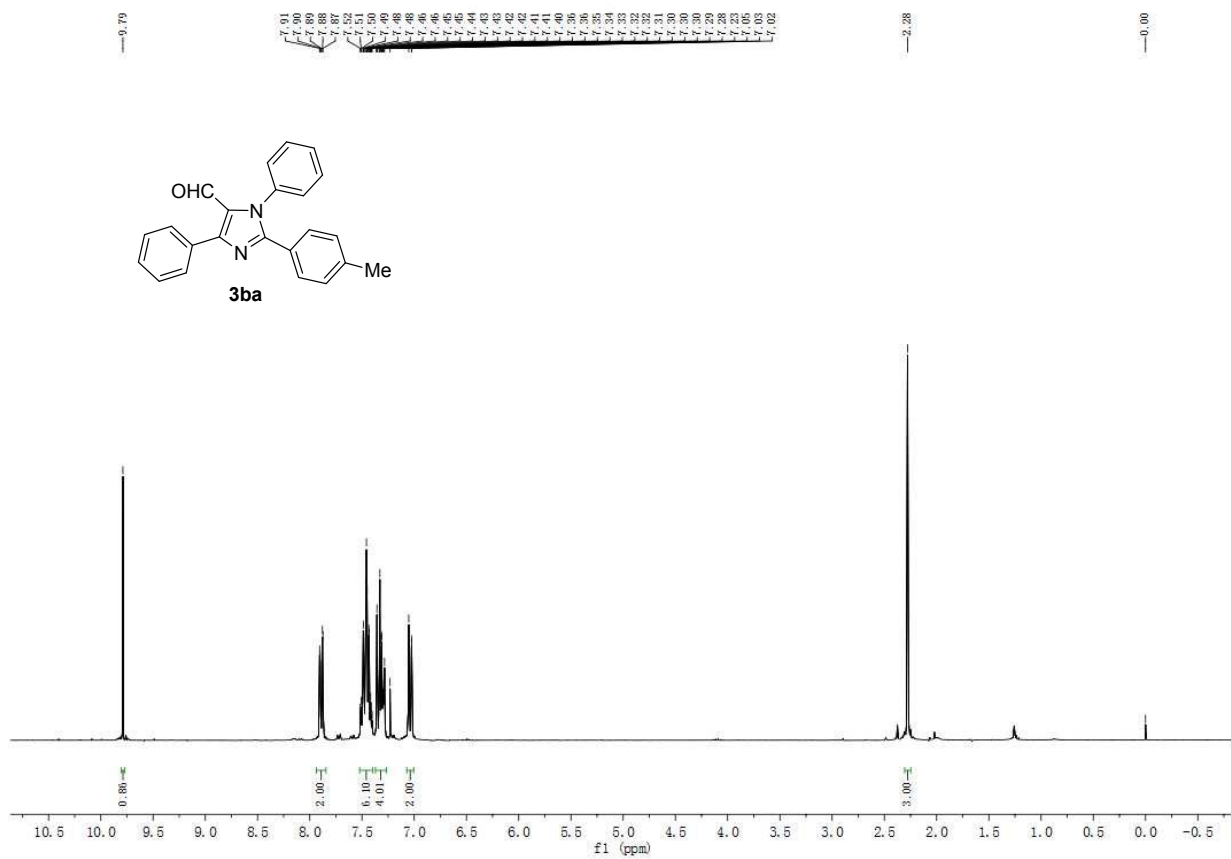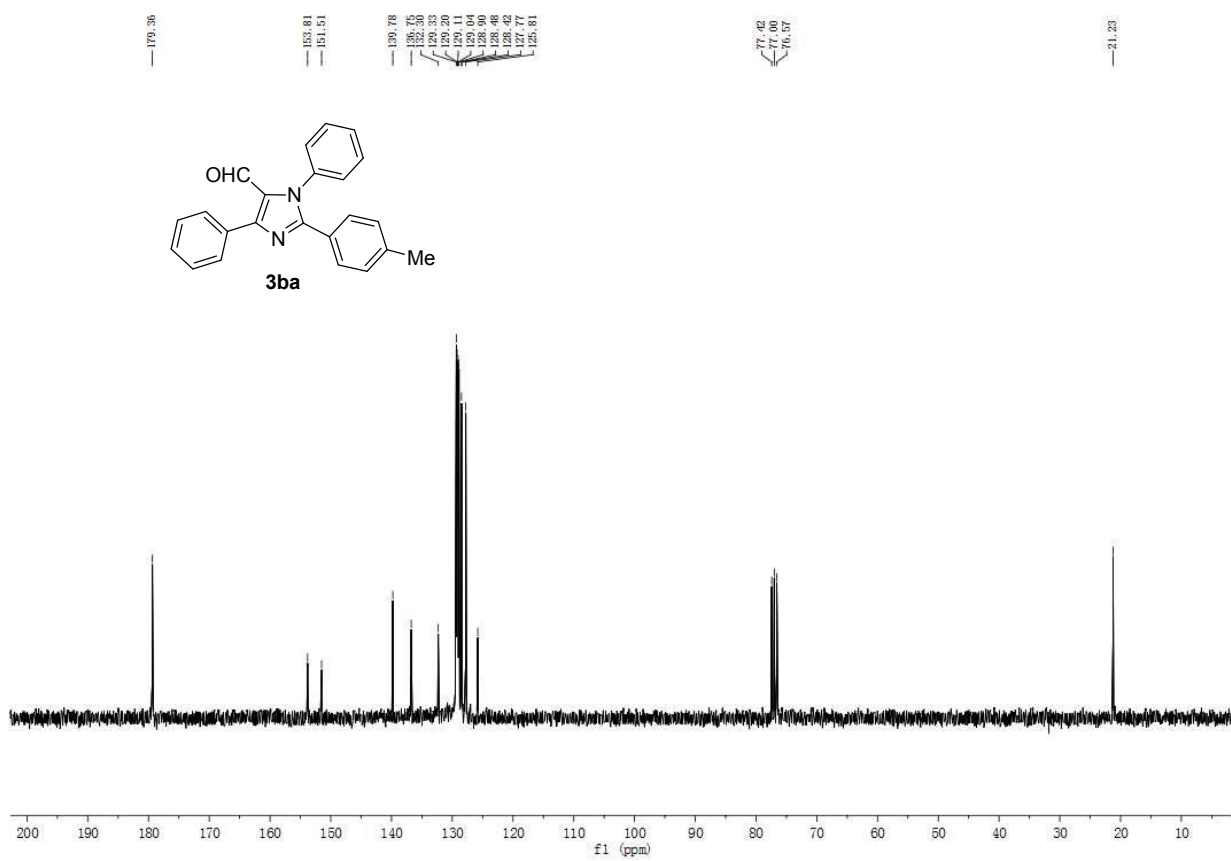

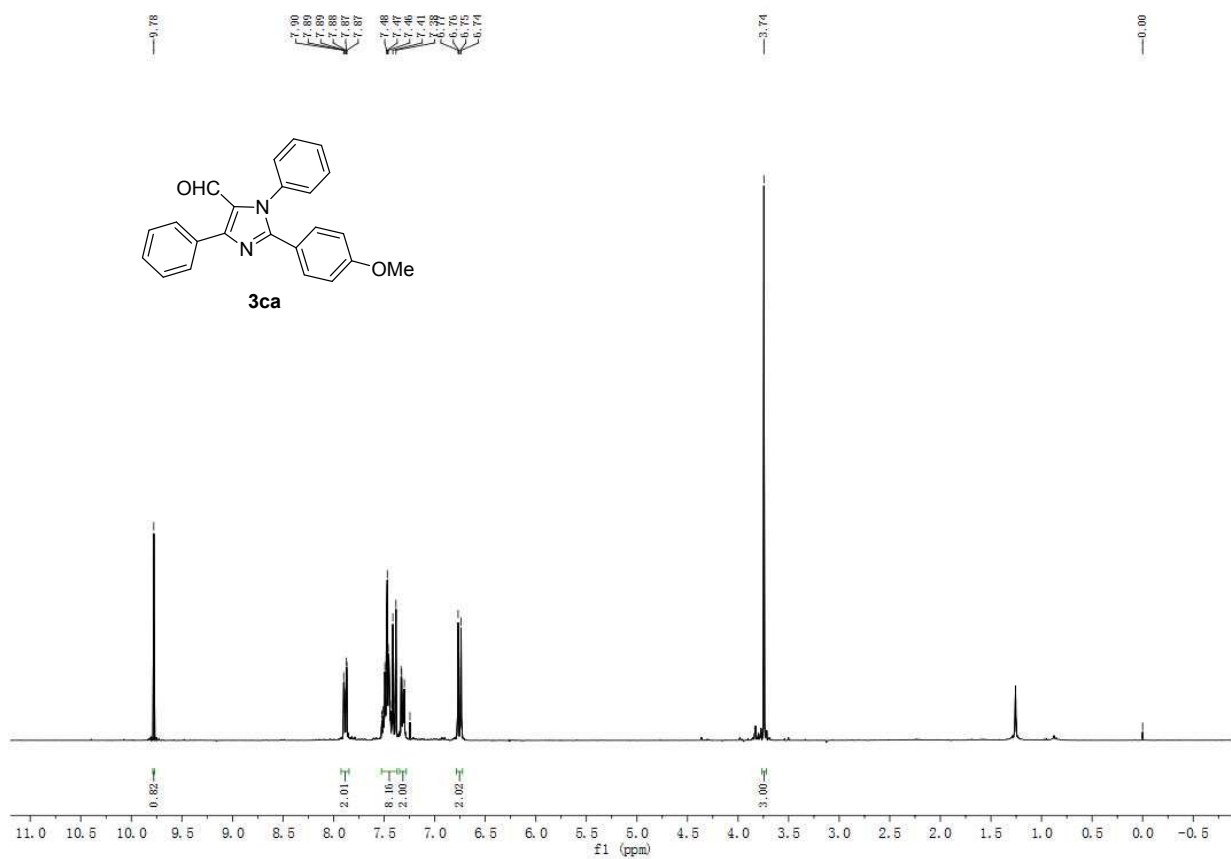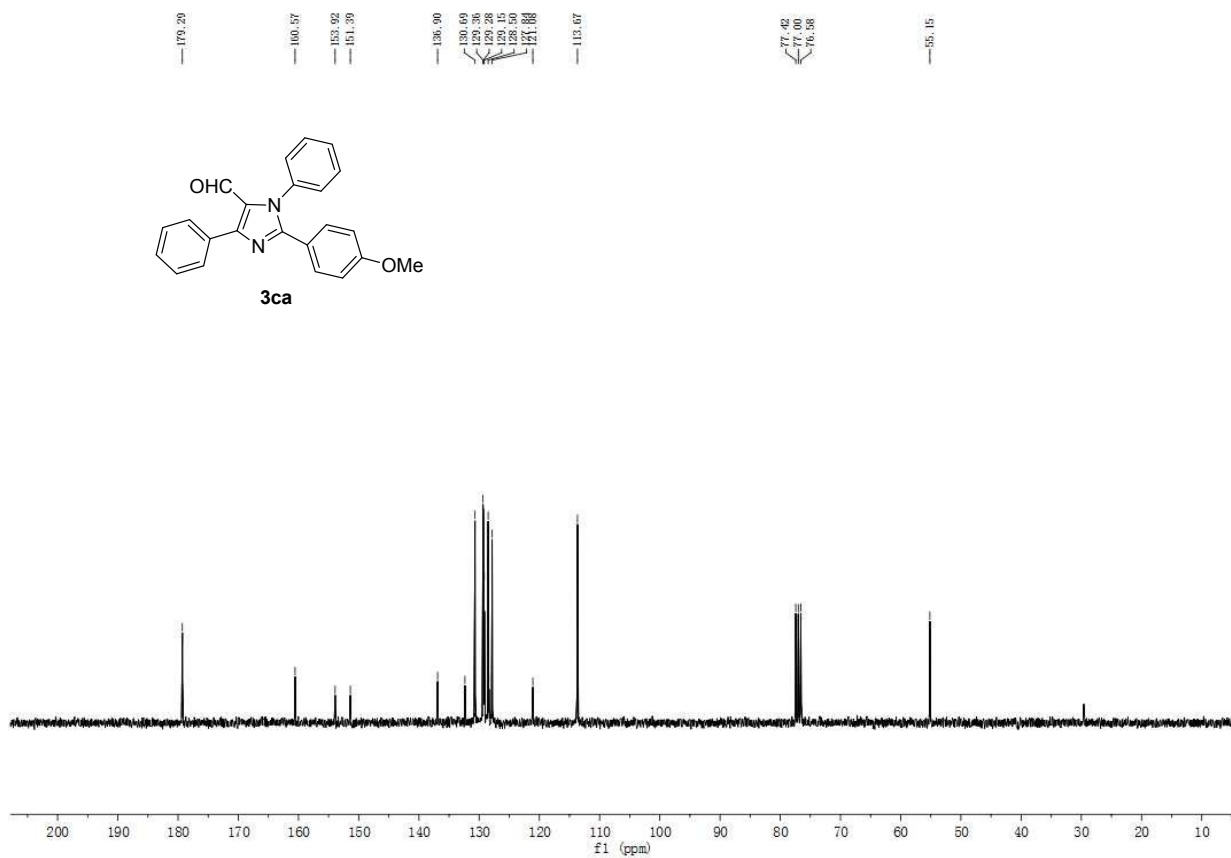

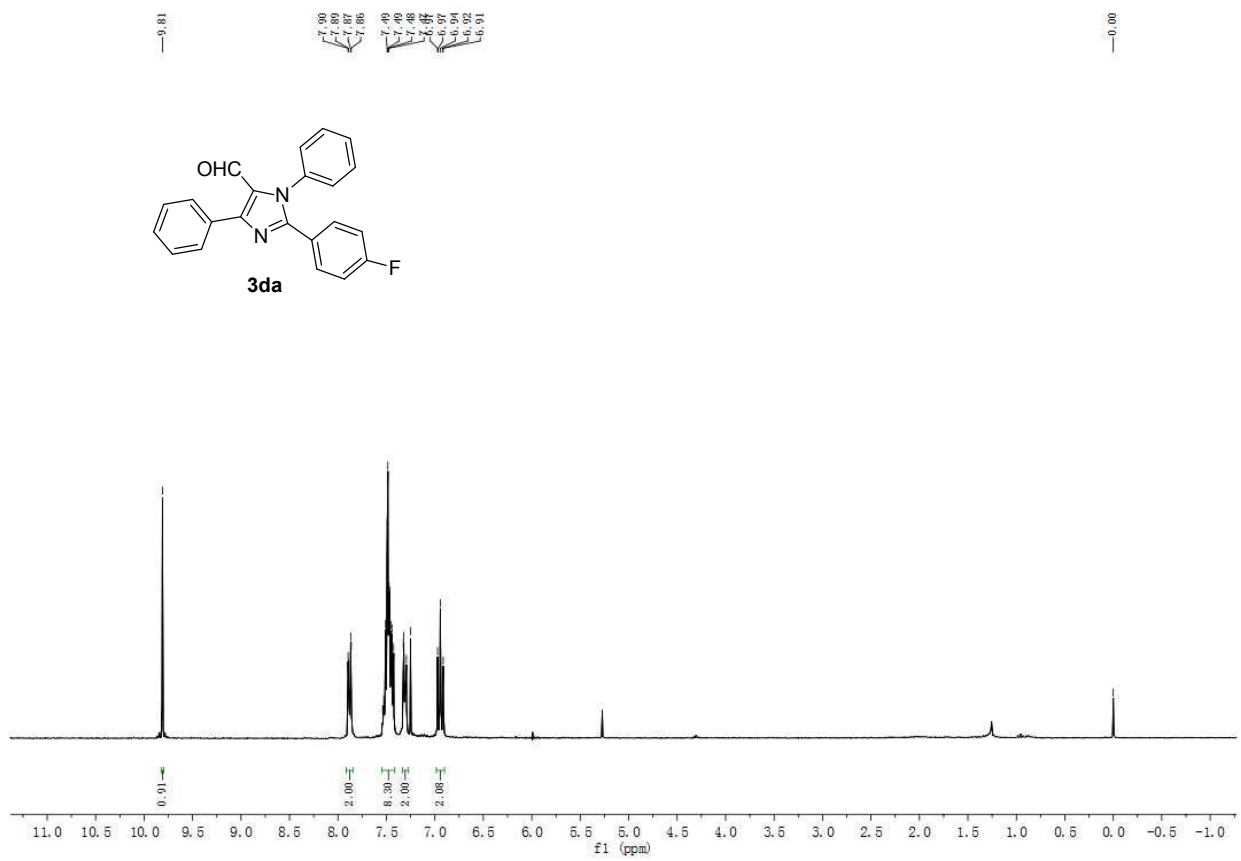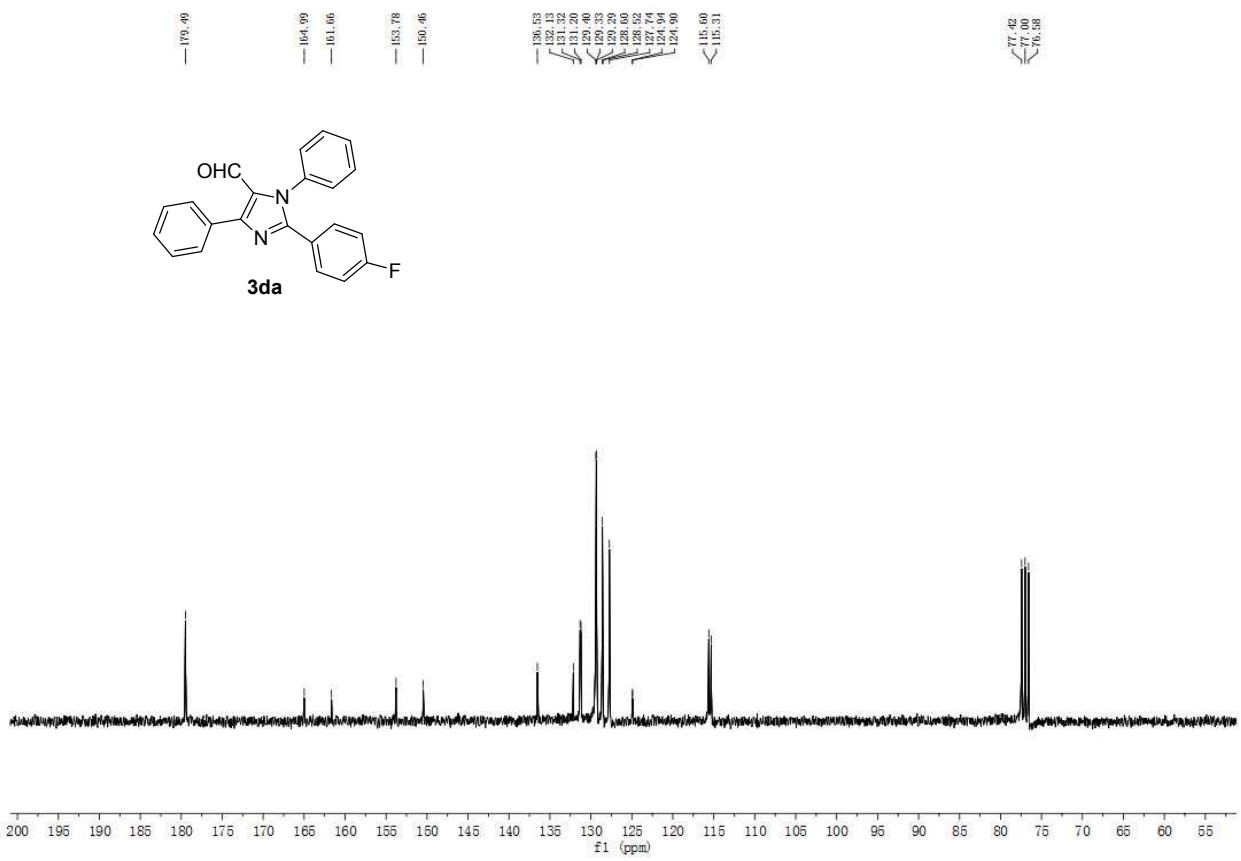

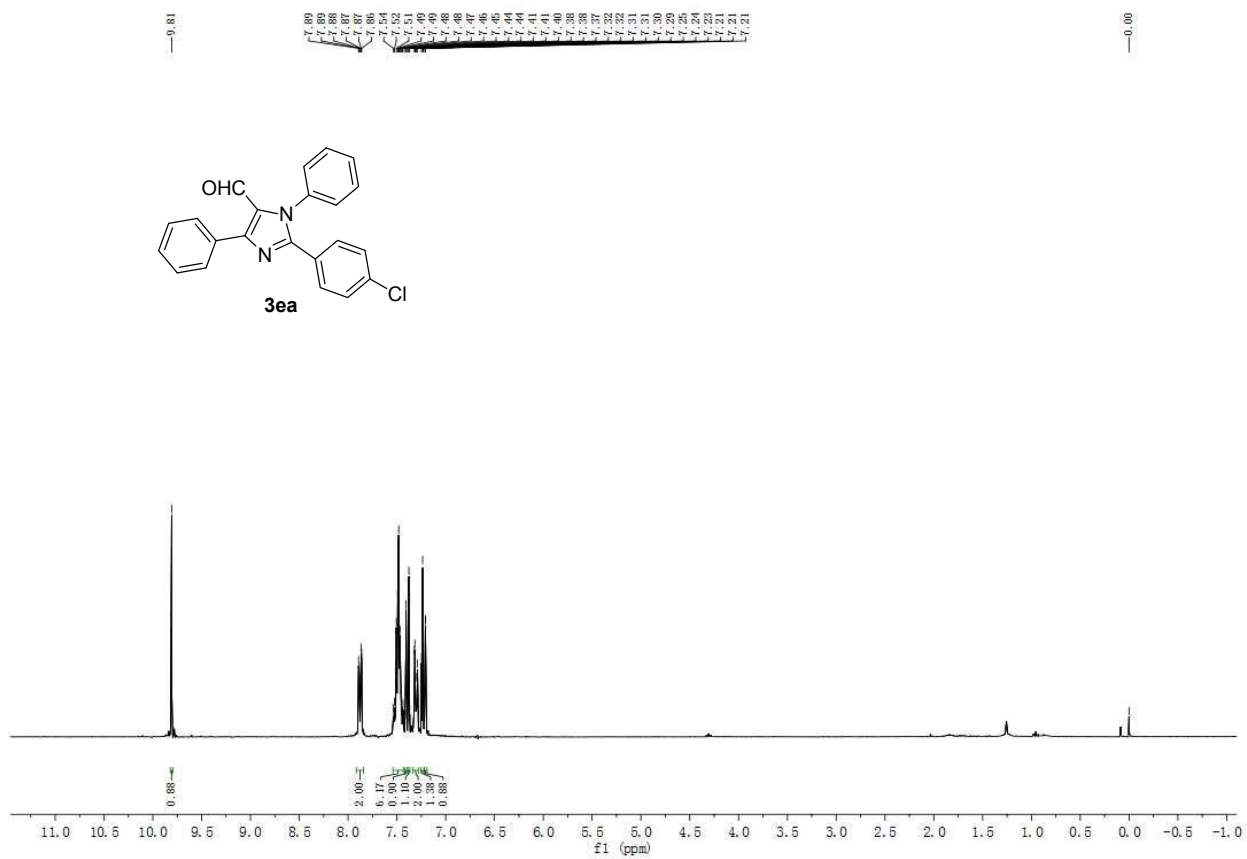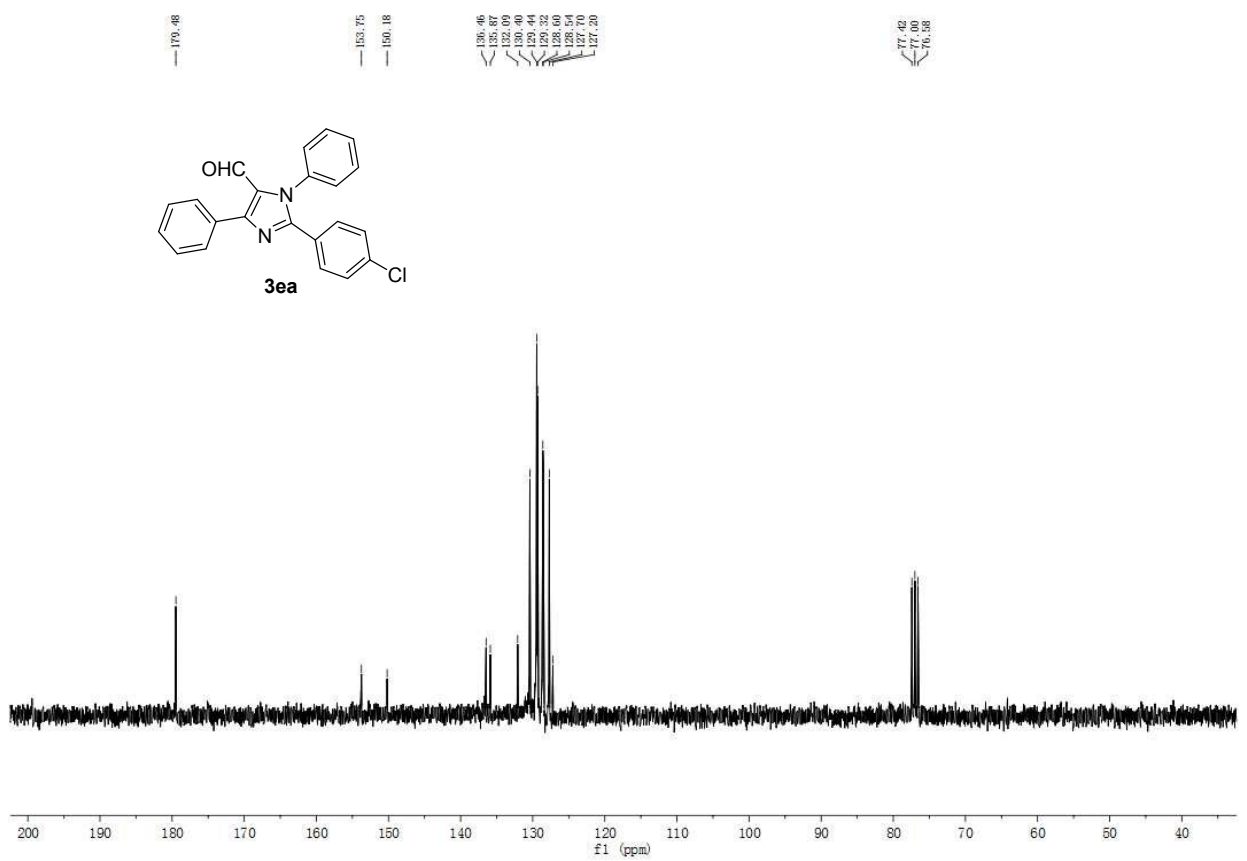

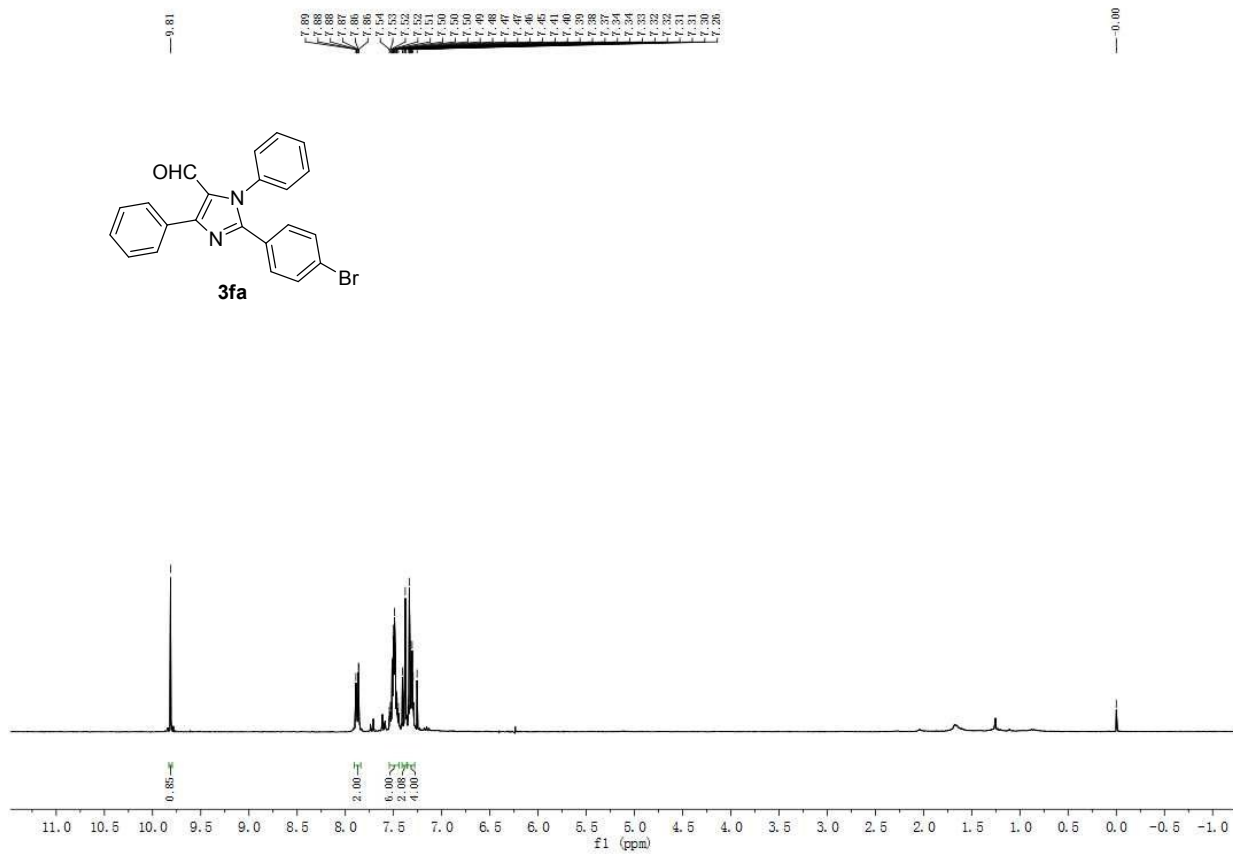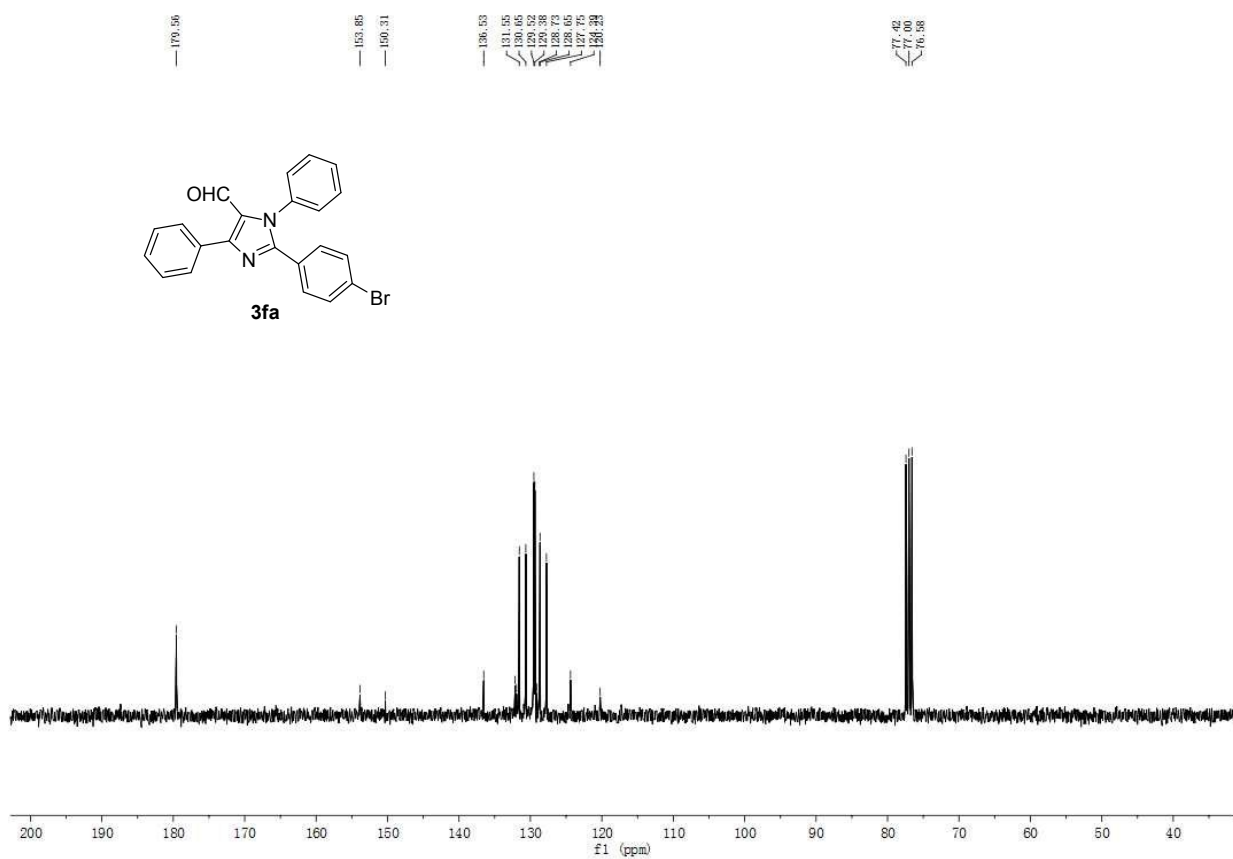

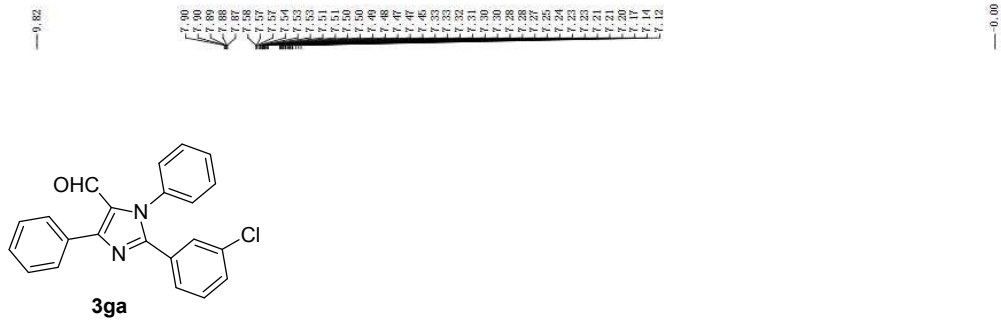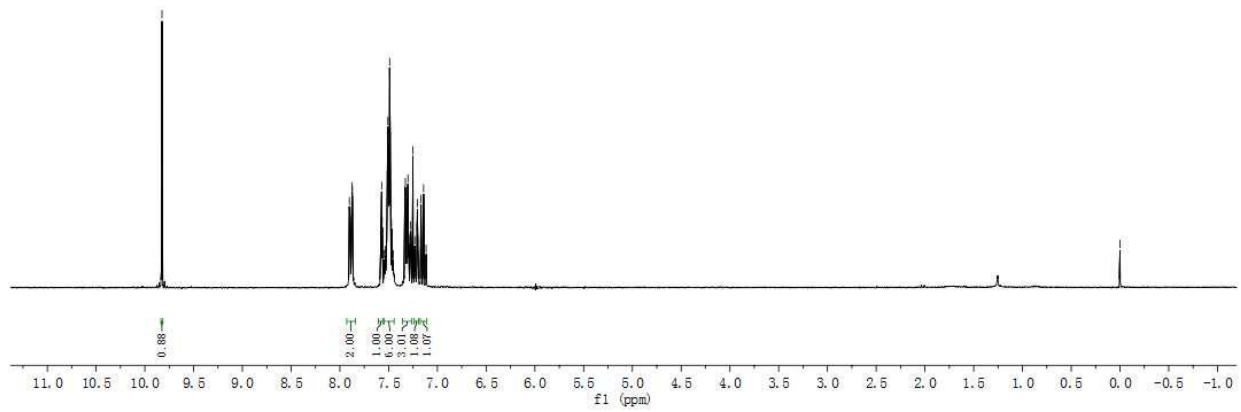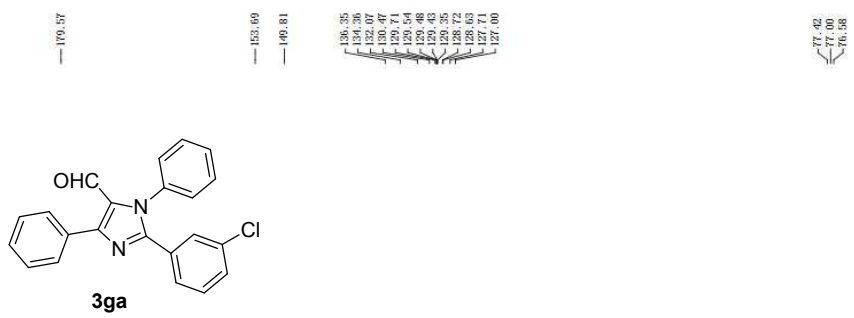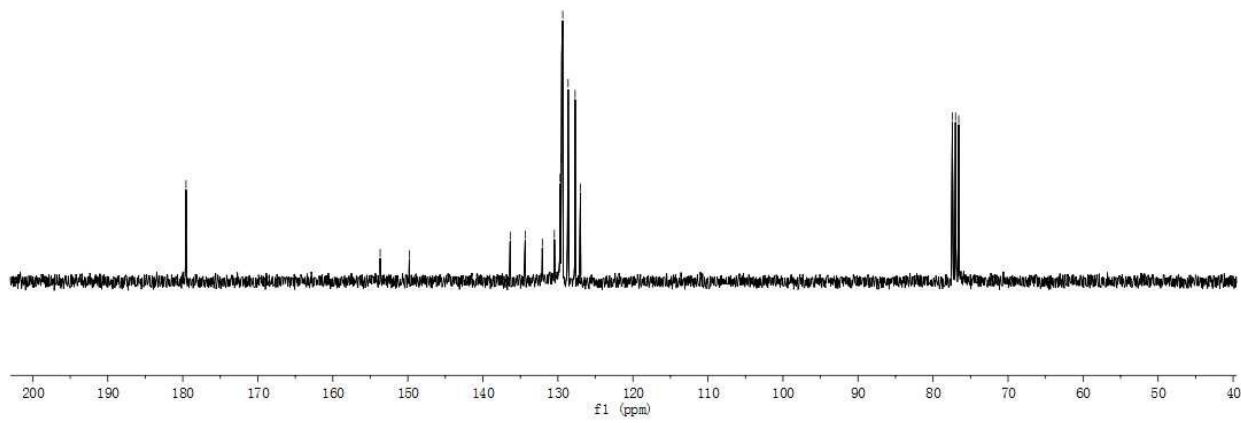



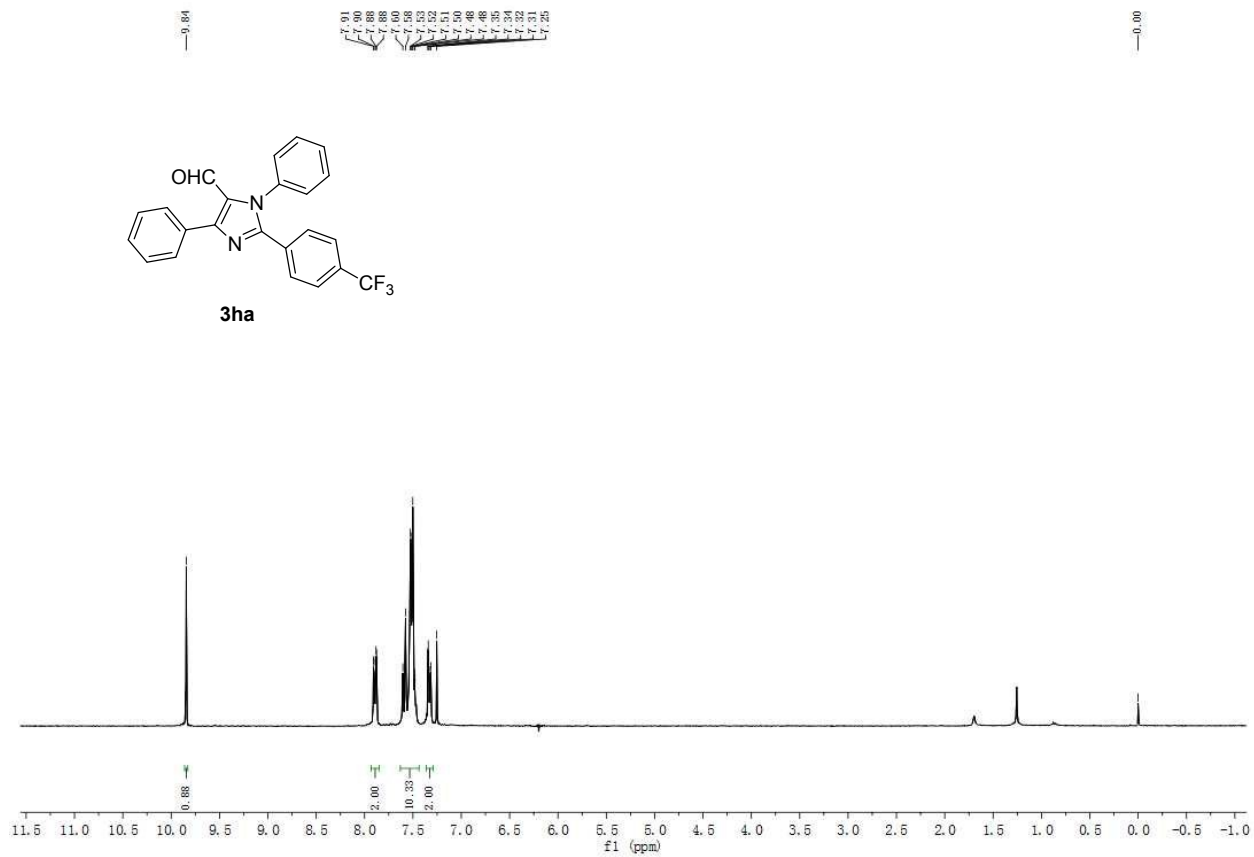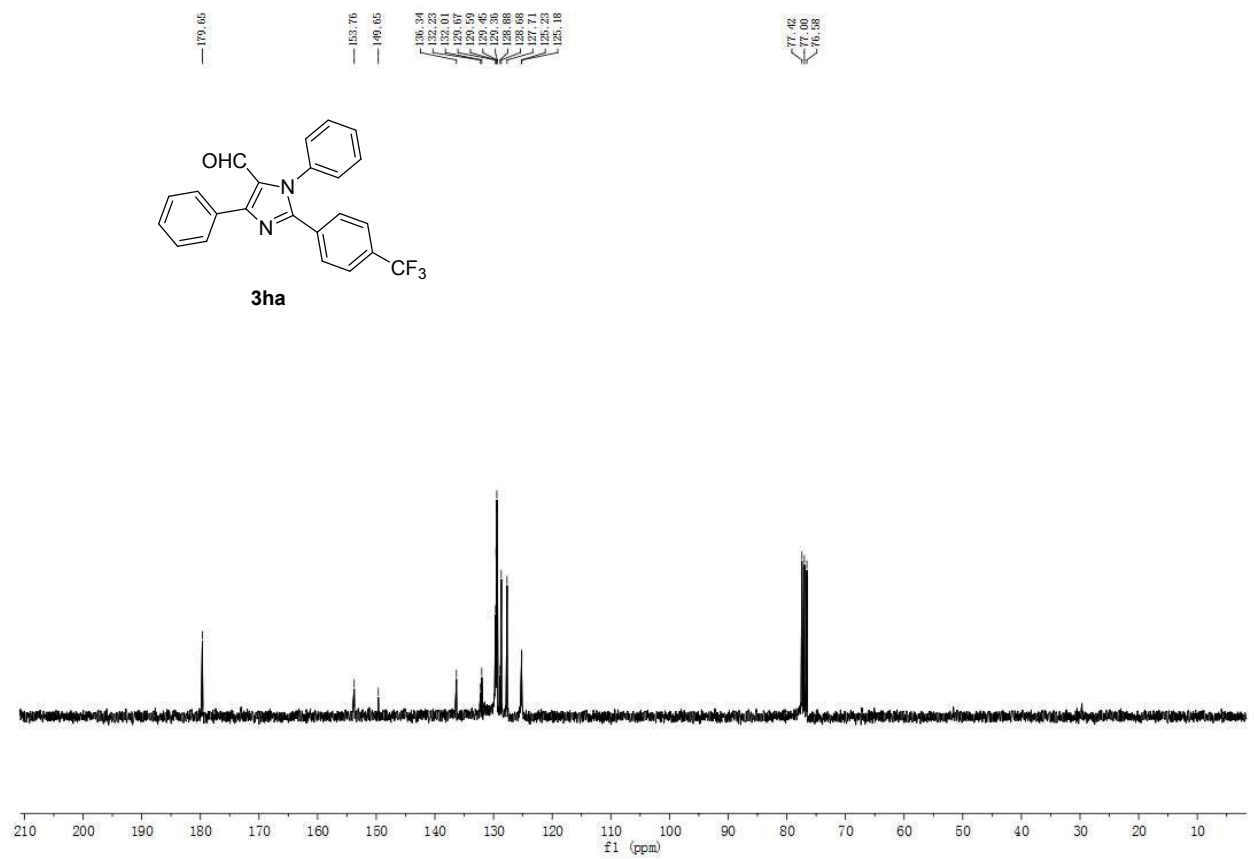

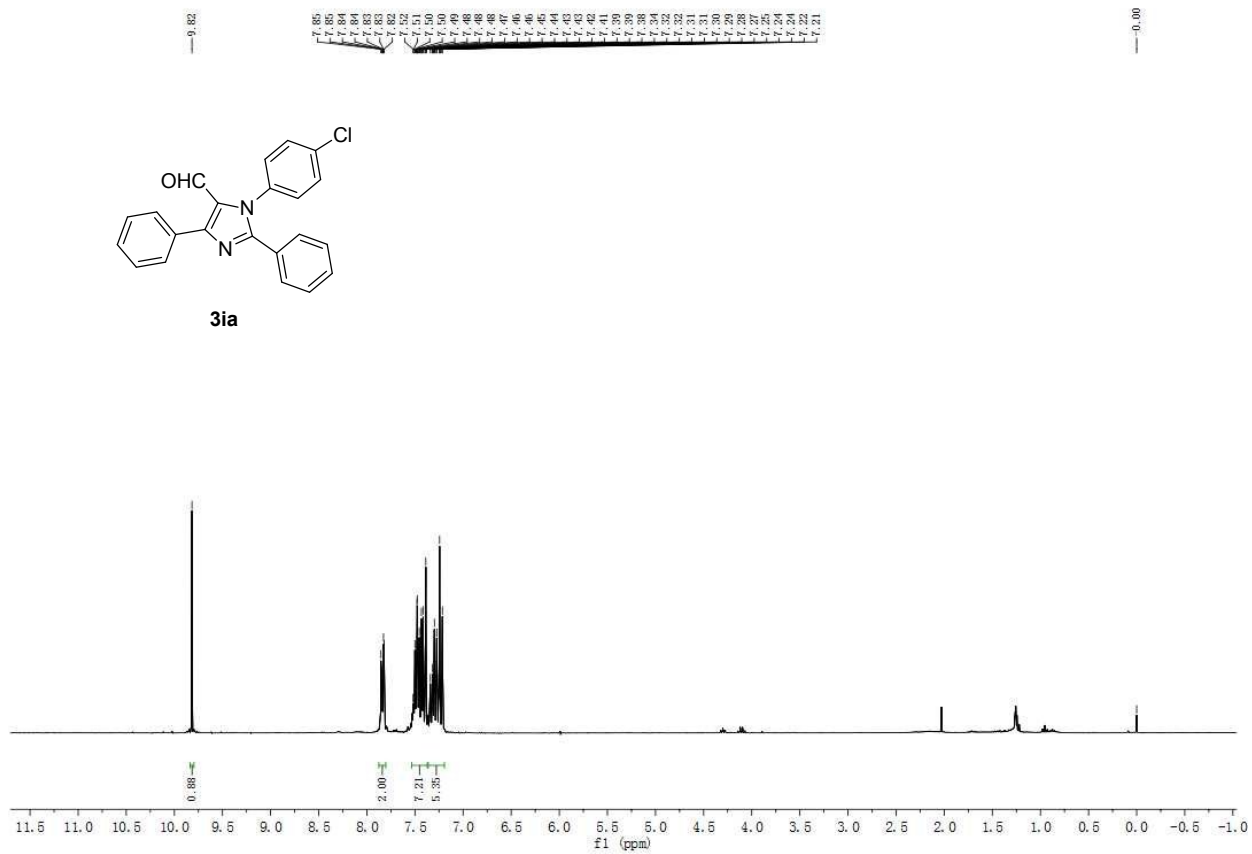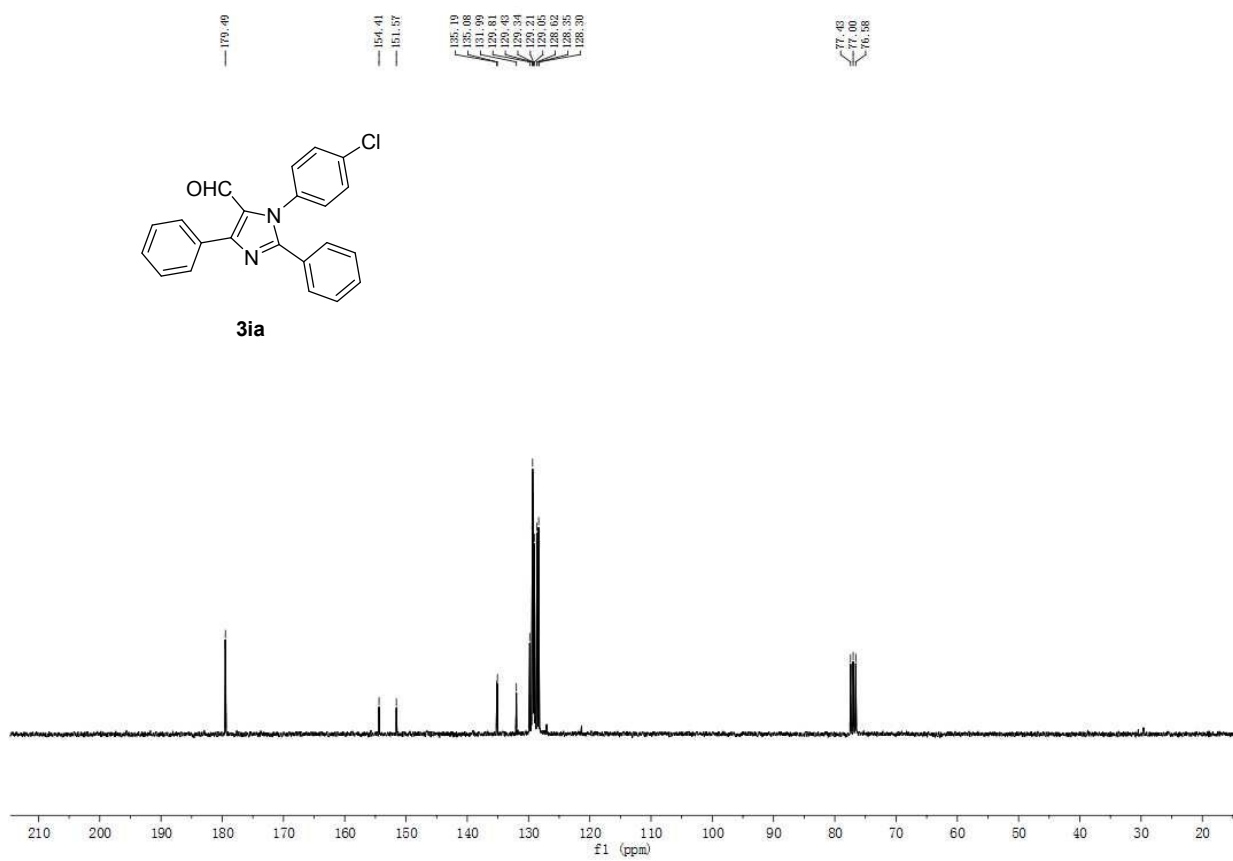

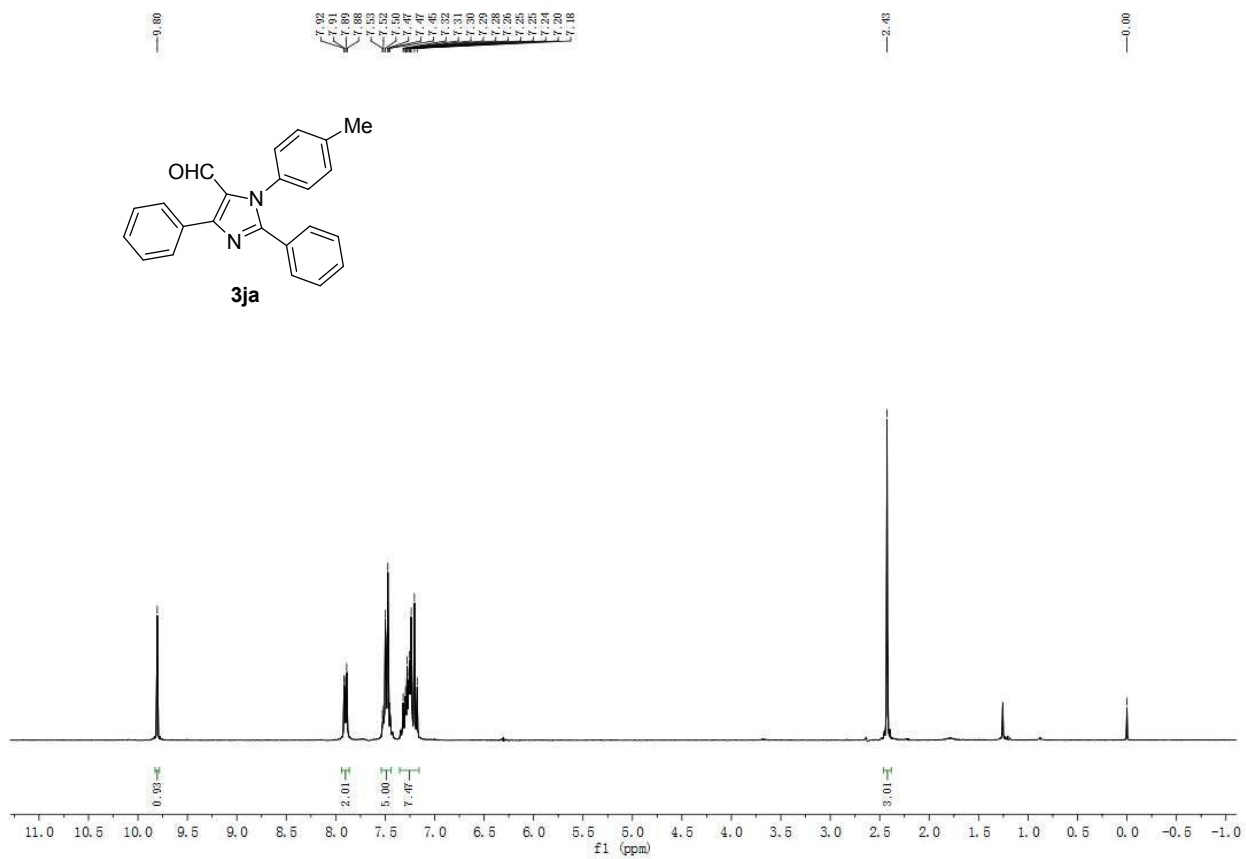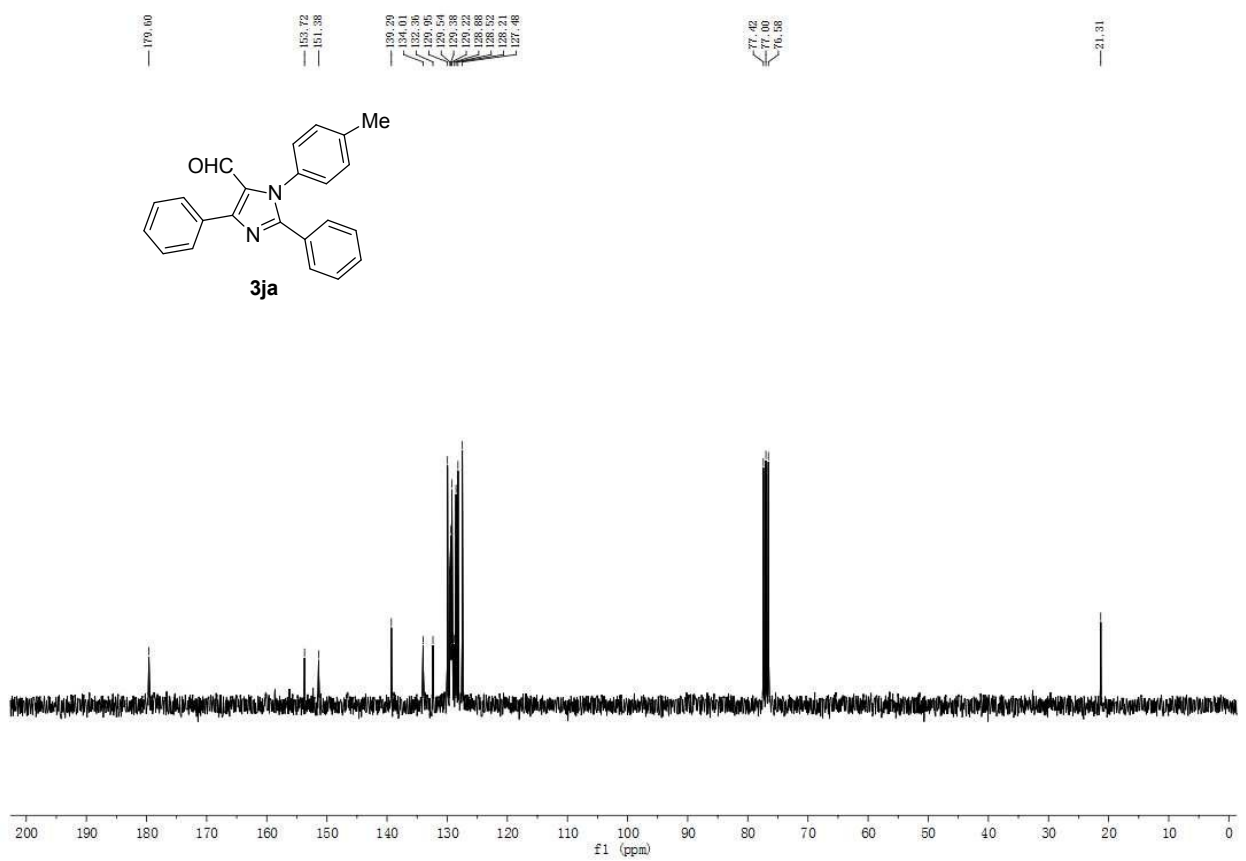

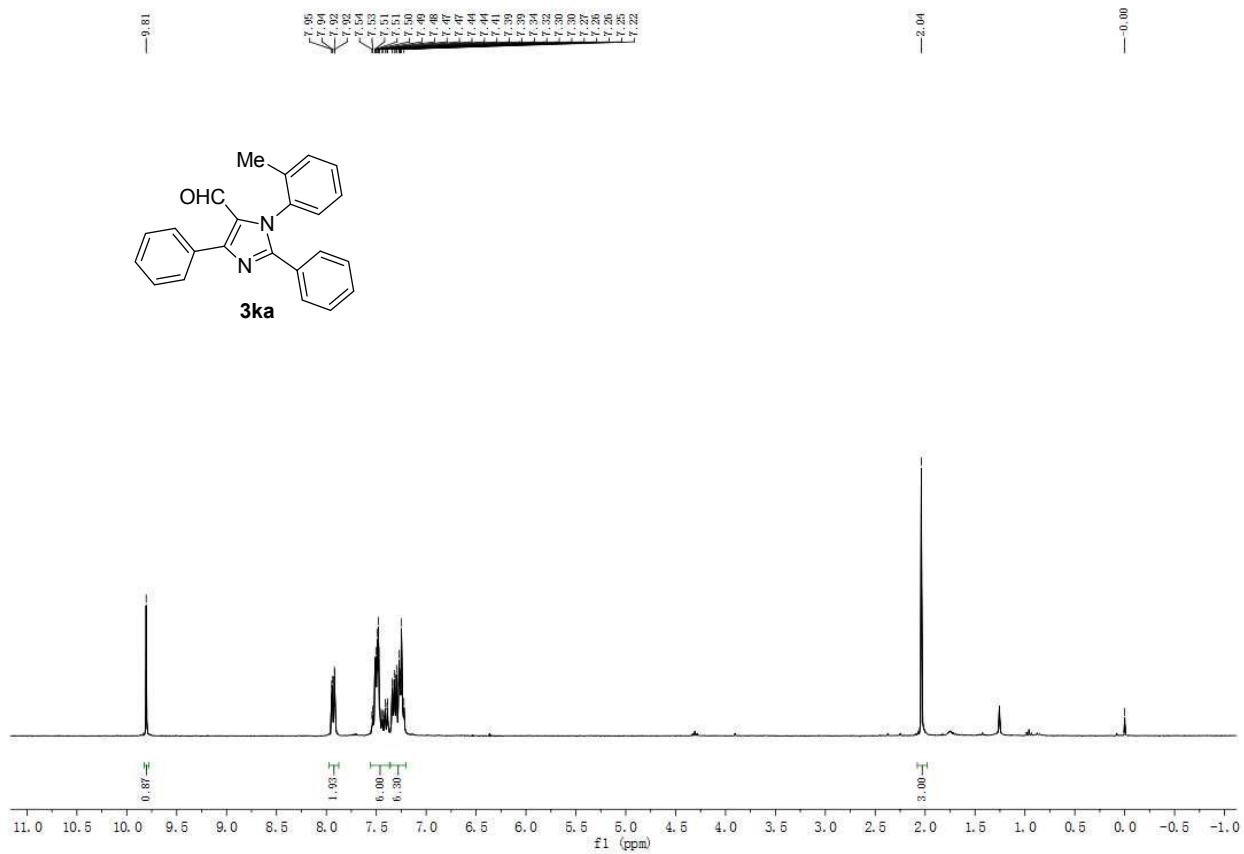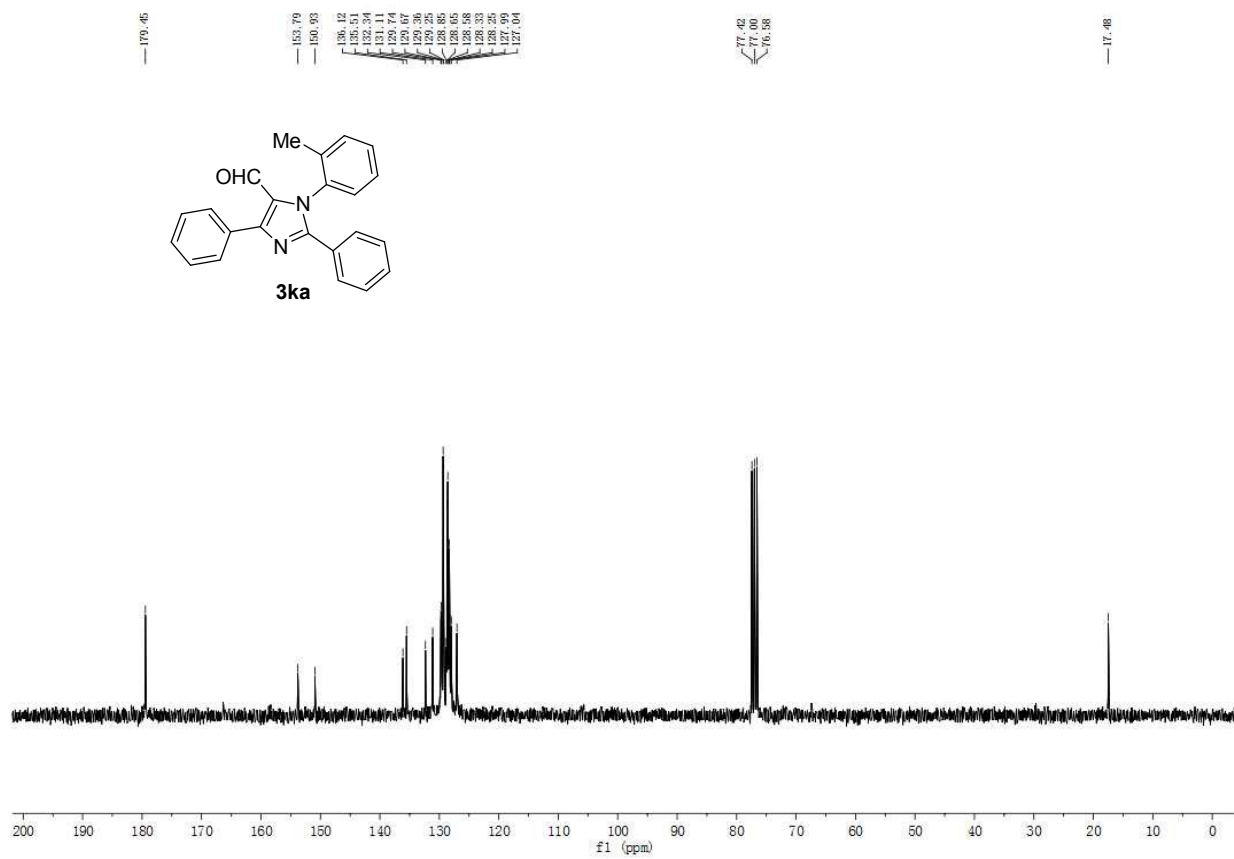

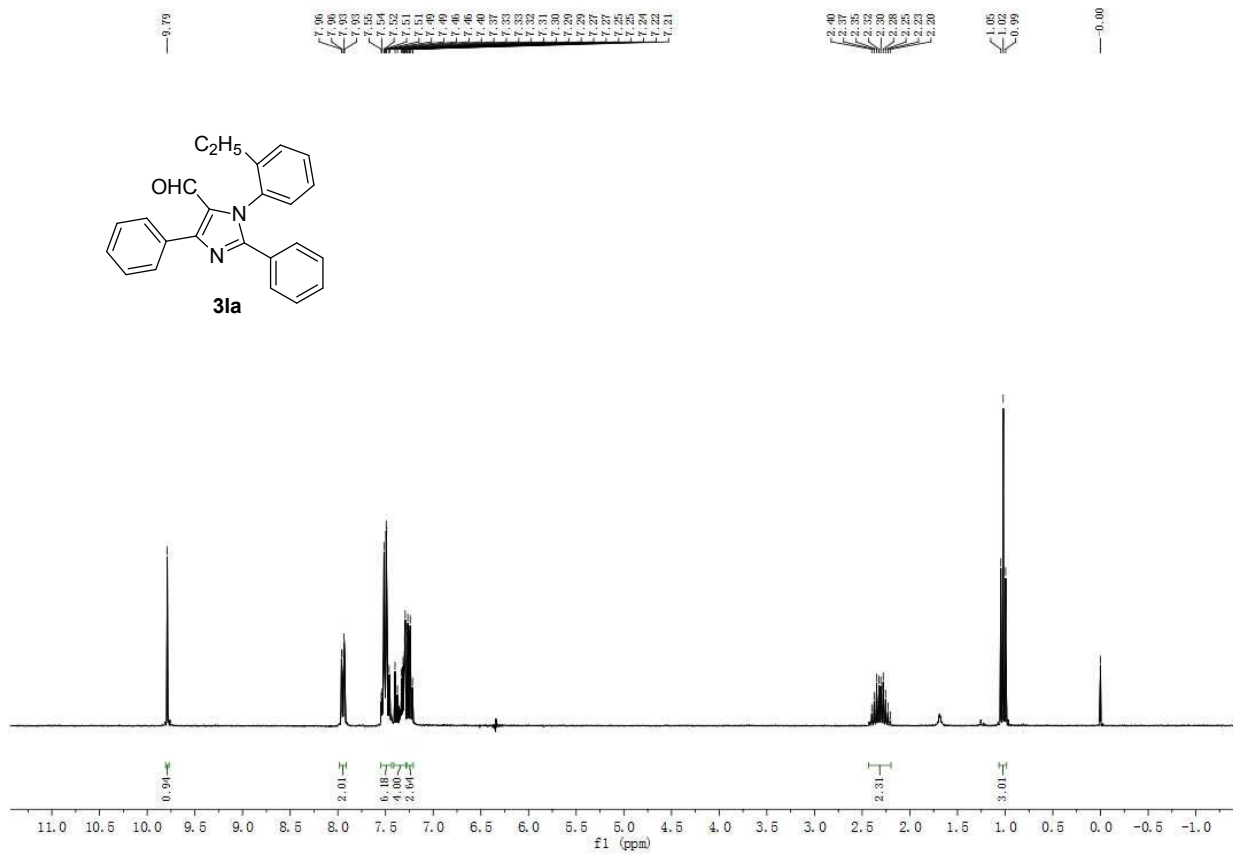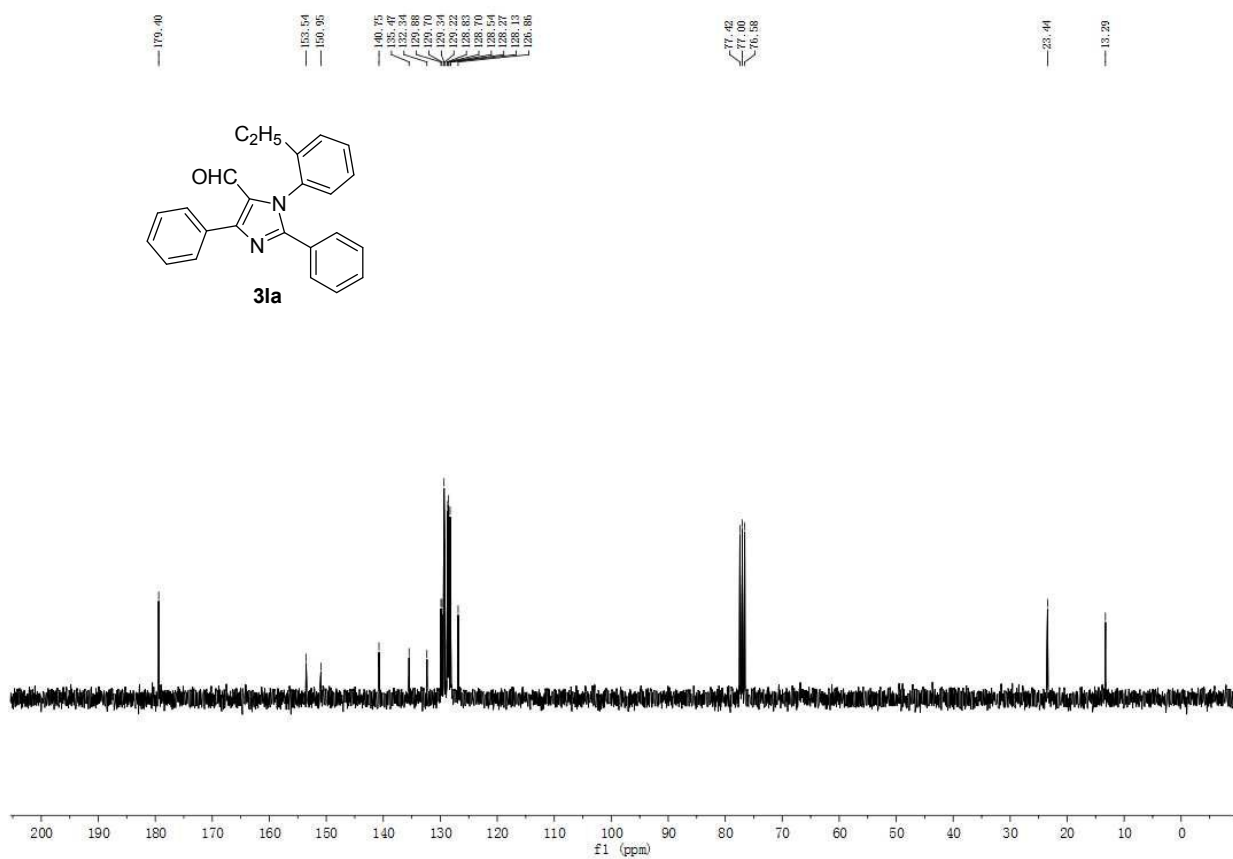

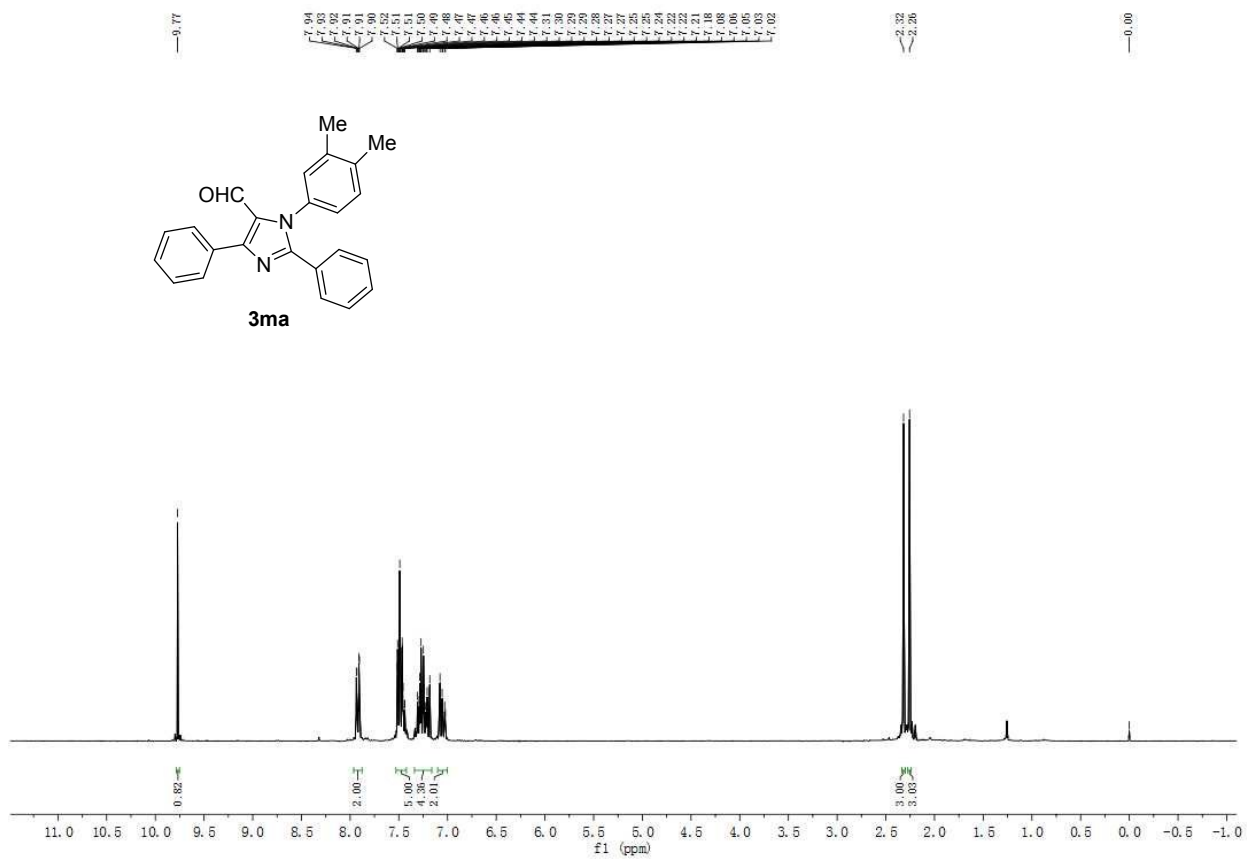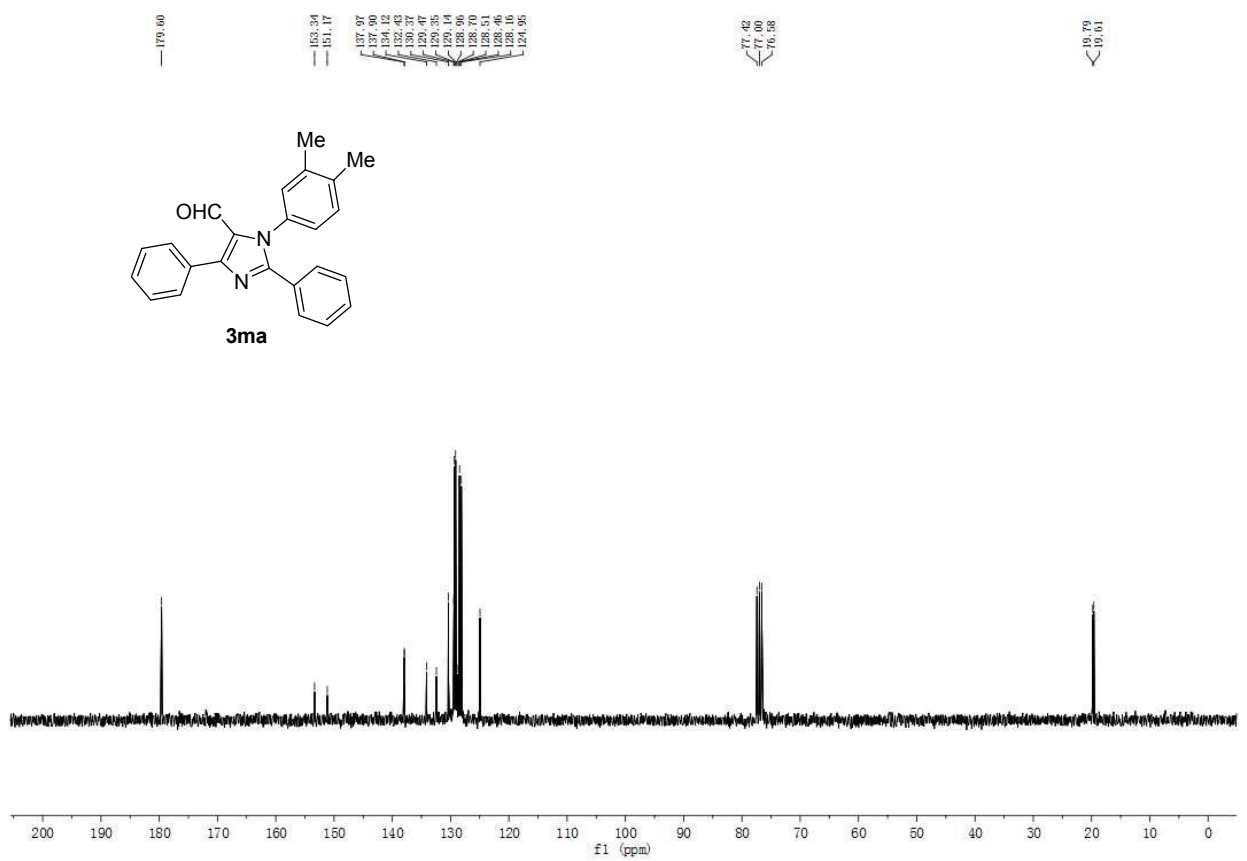

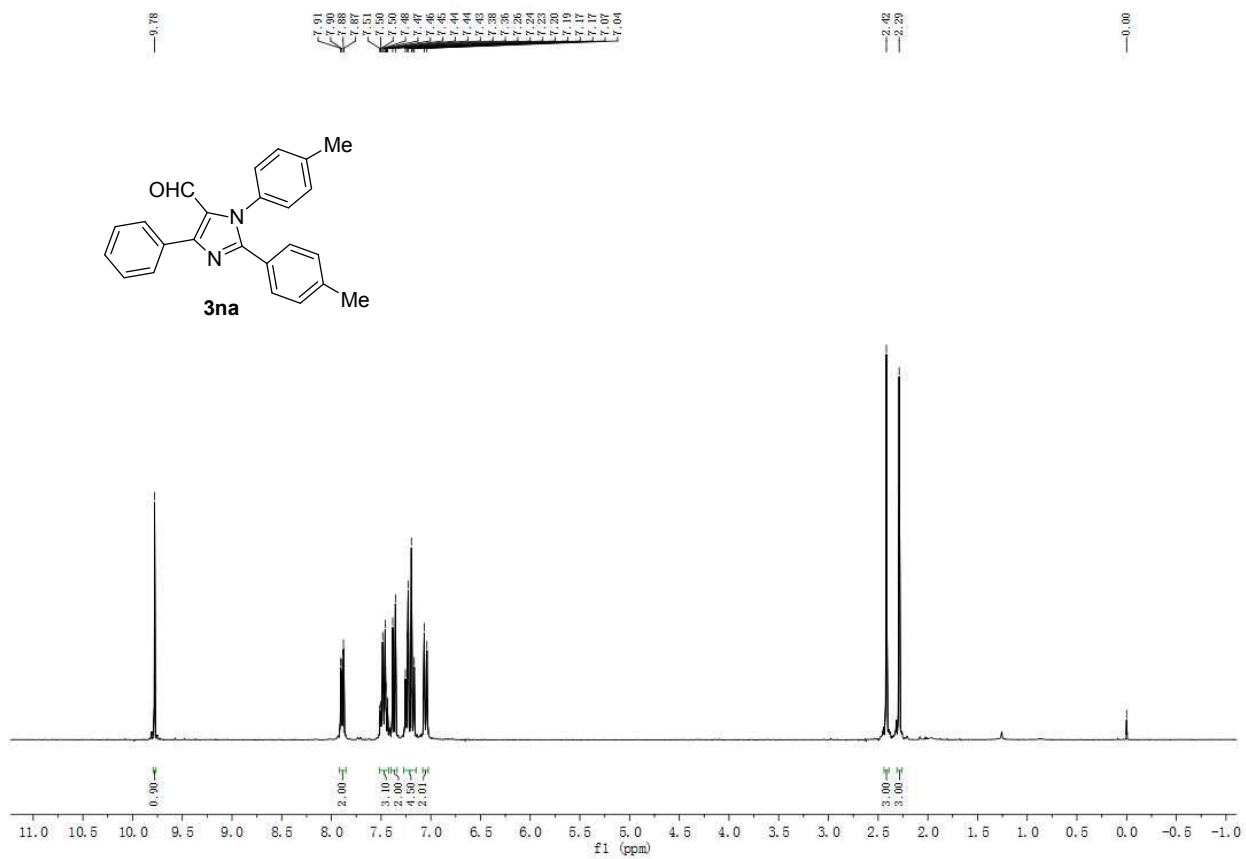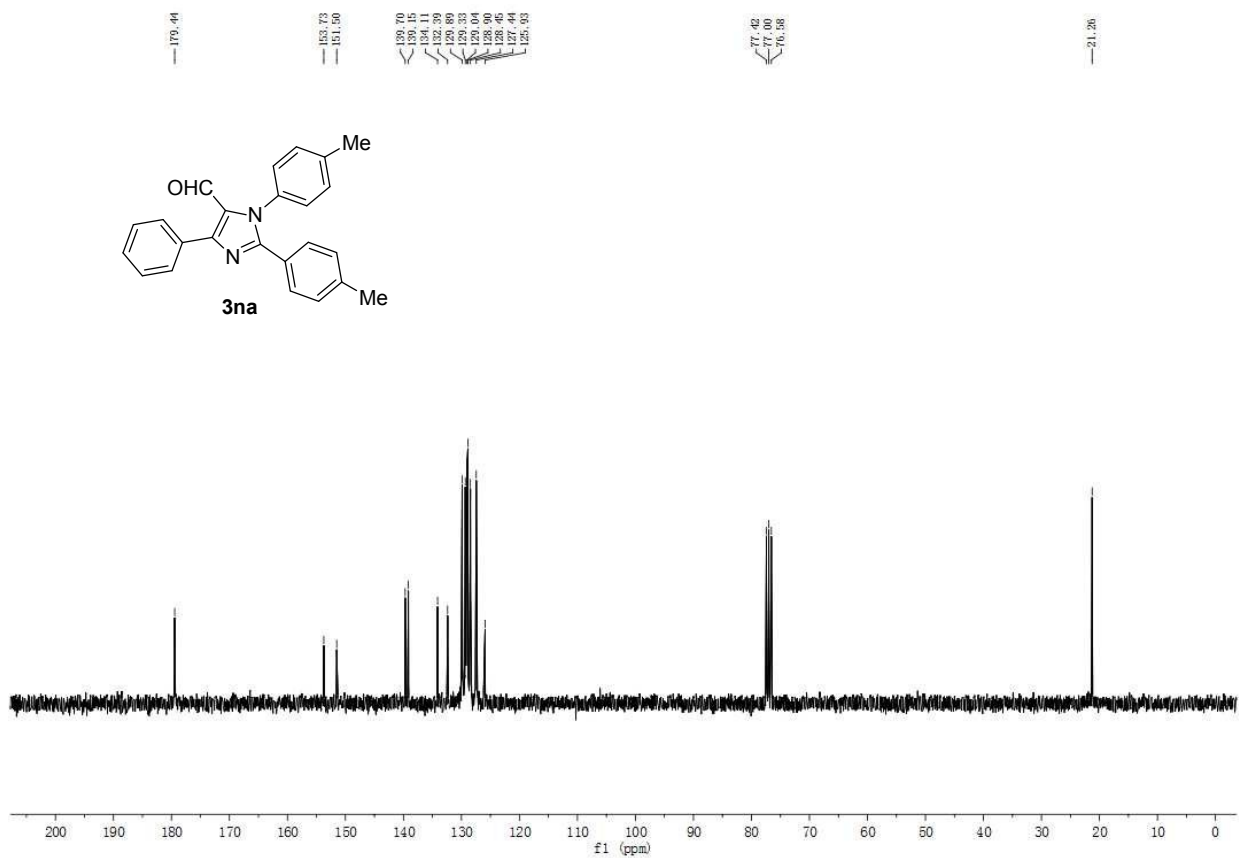

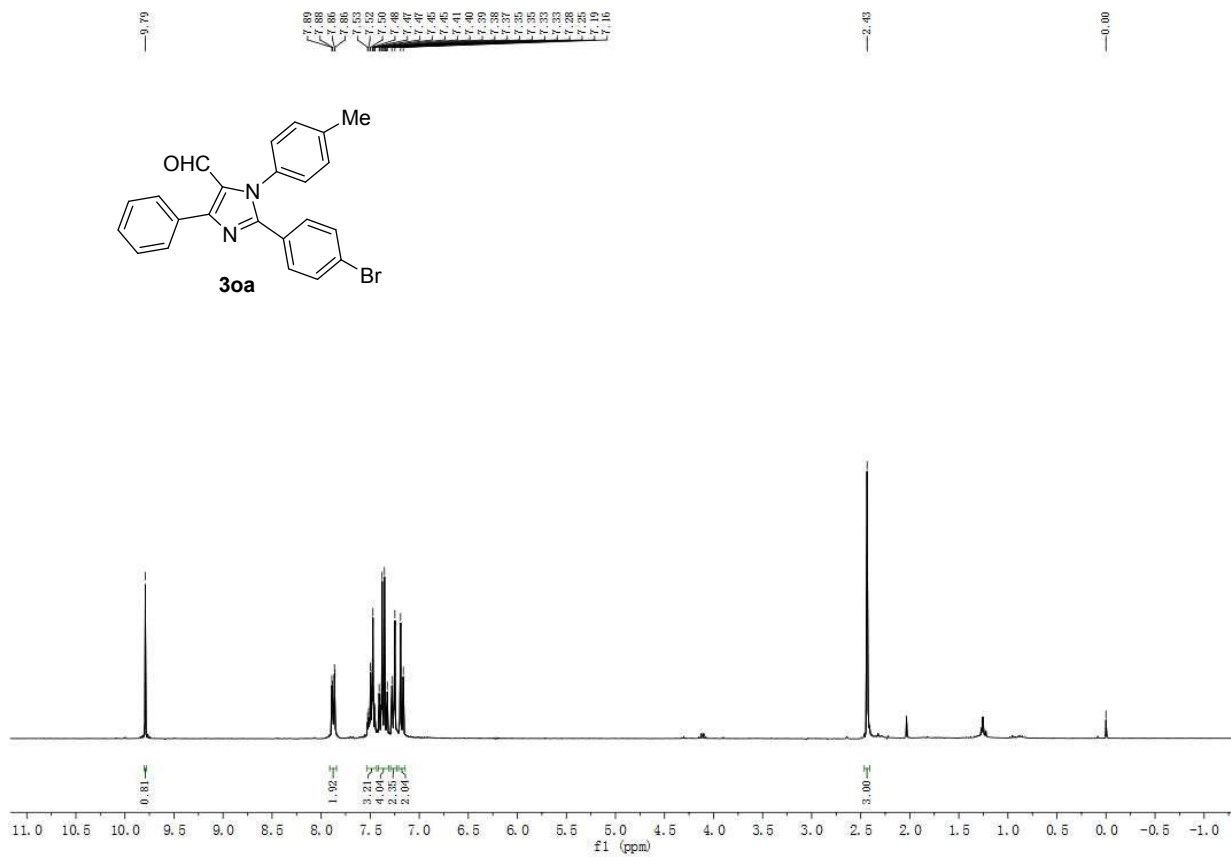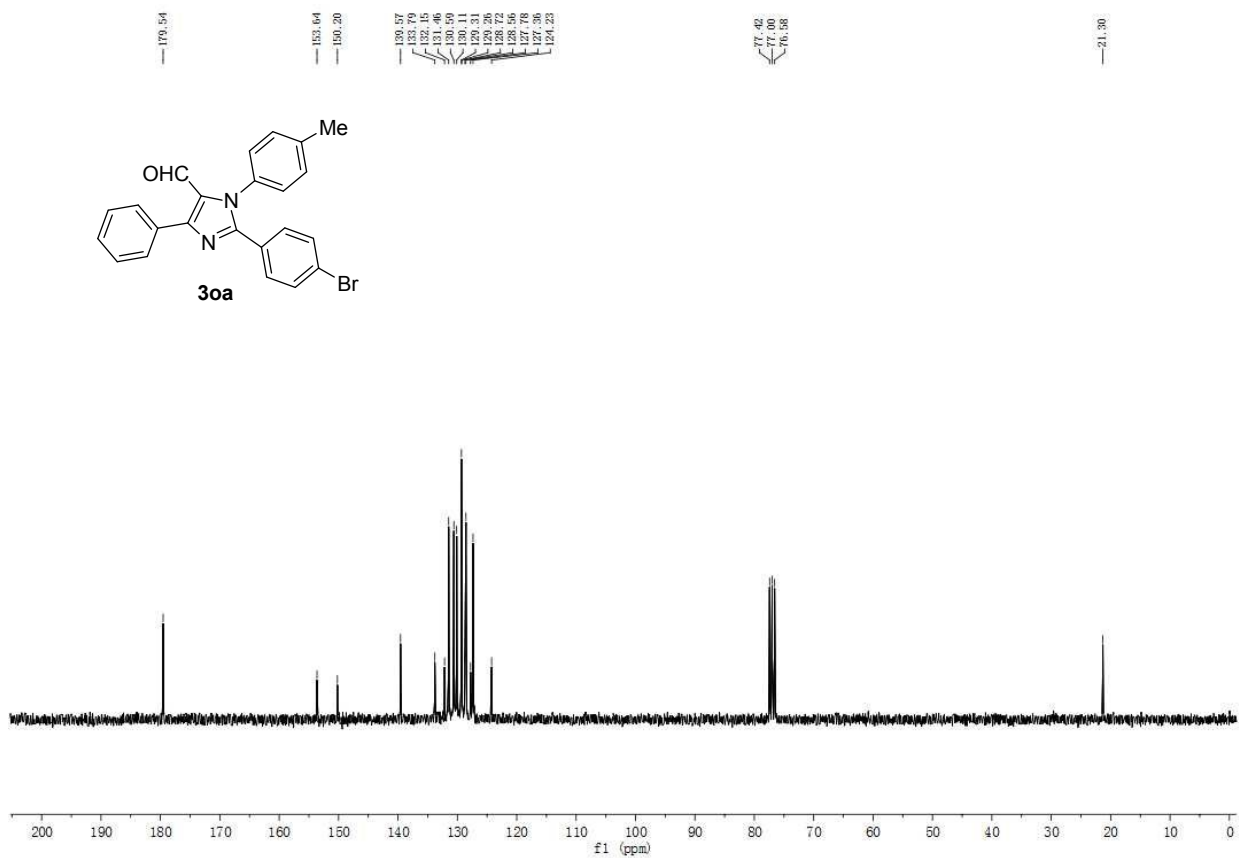



9.84  
7.97  
7.94  
7.80  
7.76  
7.59  
7.55  
7.52  
7.50  
7.44  
7.30  
7.27  
7.22  
7.19  
7.17

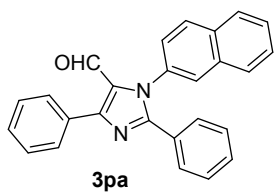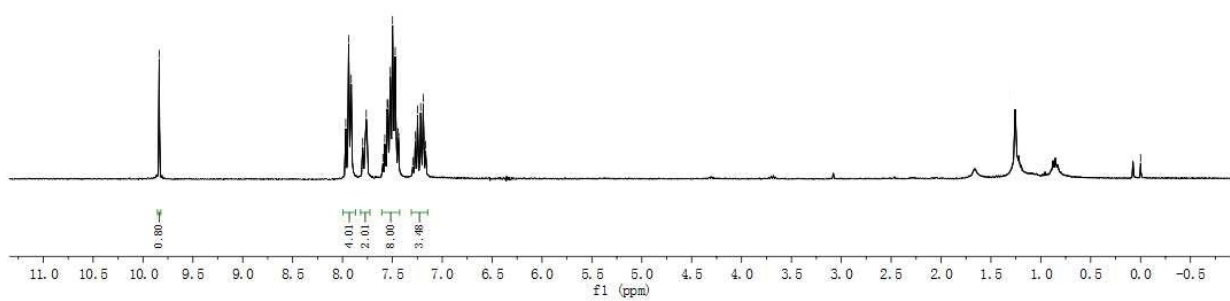

179.57  
153.91  
151.66  
134.00  
133.03  
132.36  
131.65  
129.46  
129.35  
129.29  
129.28  
129.25  
128.79  
128.61  
128.31  
128.29  
127.96  
127.24  
127.01  
126.61  
125.46  
77.42  
77.00  
76.58

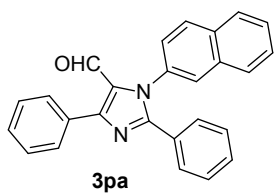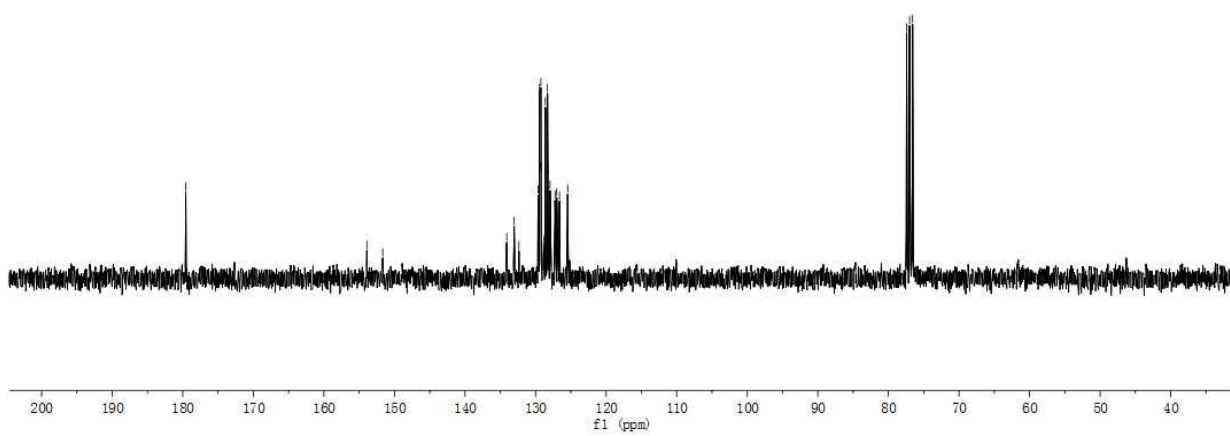

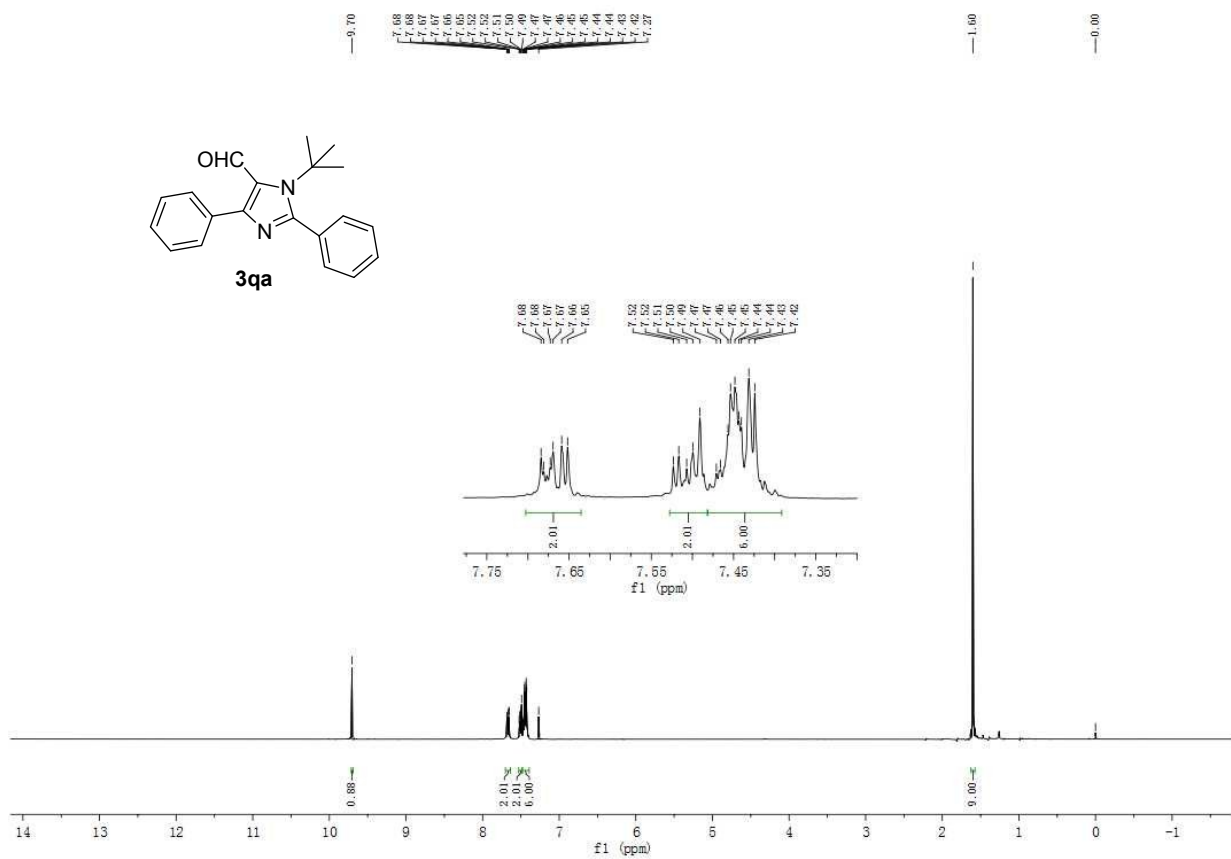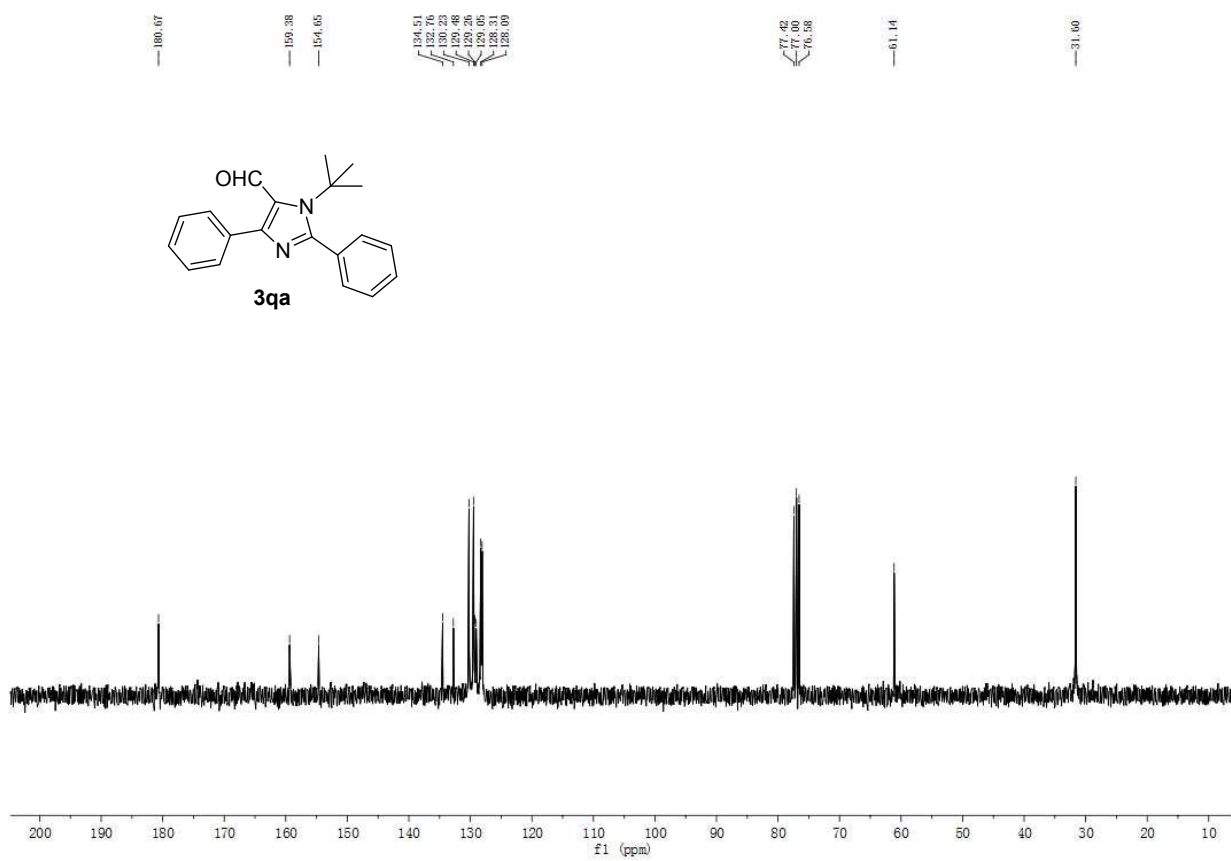

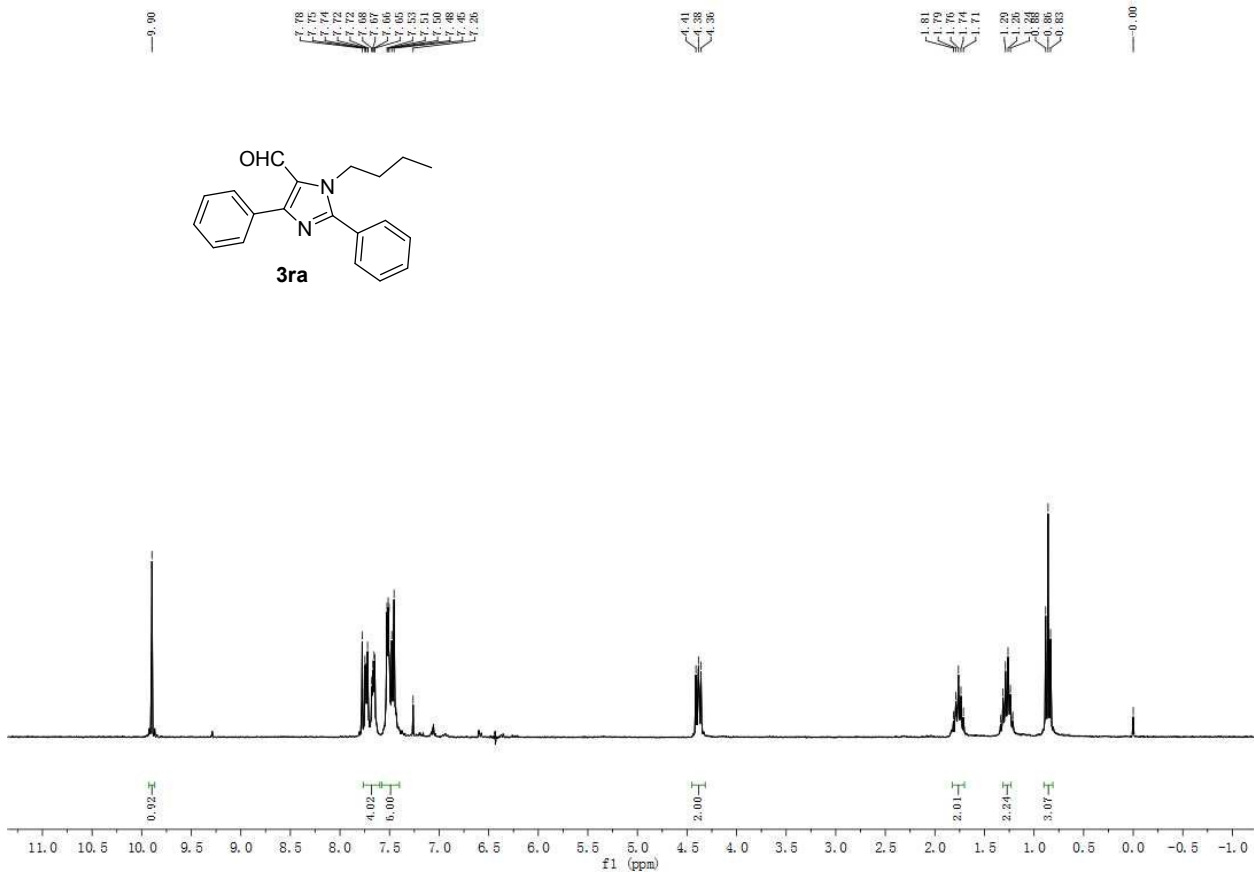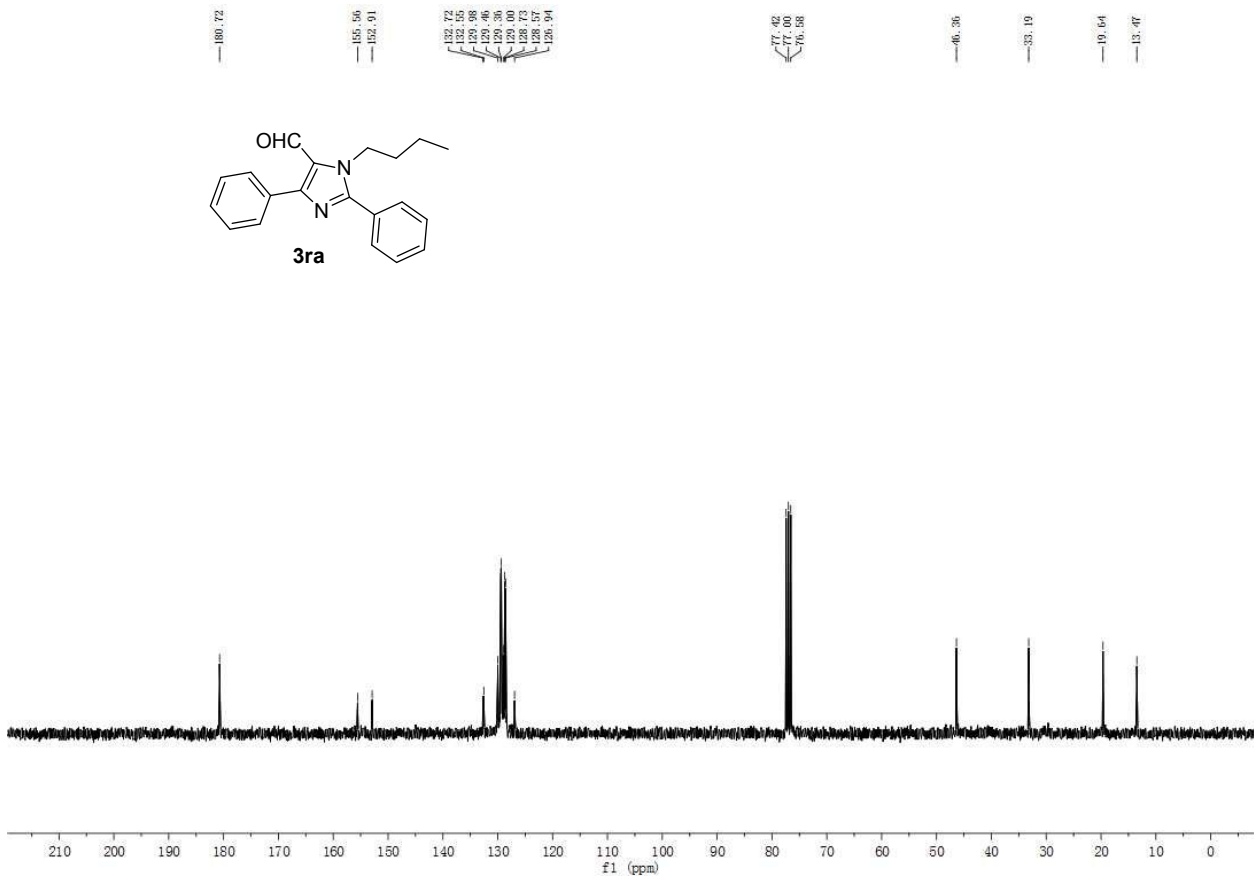

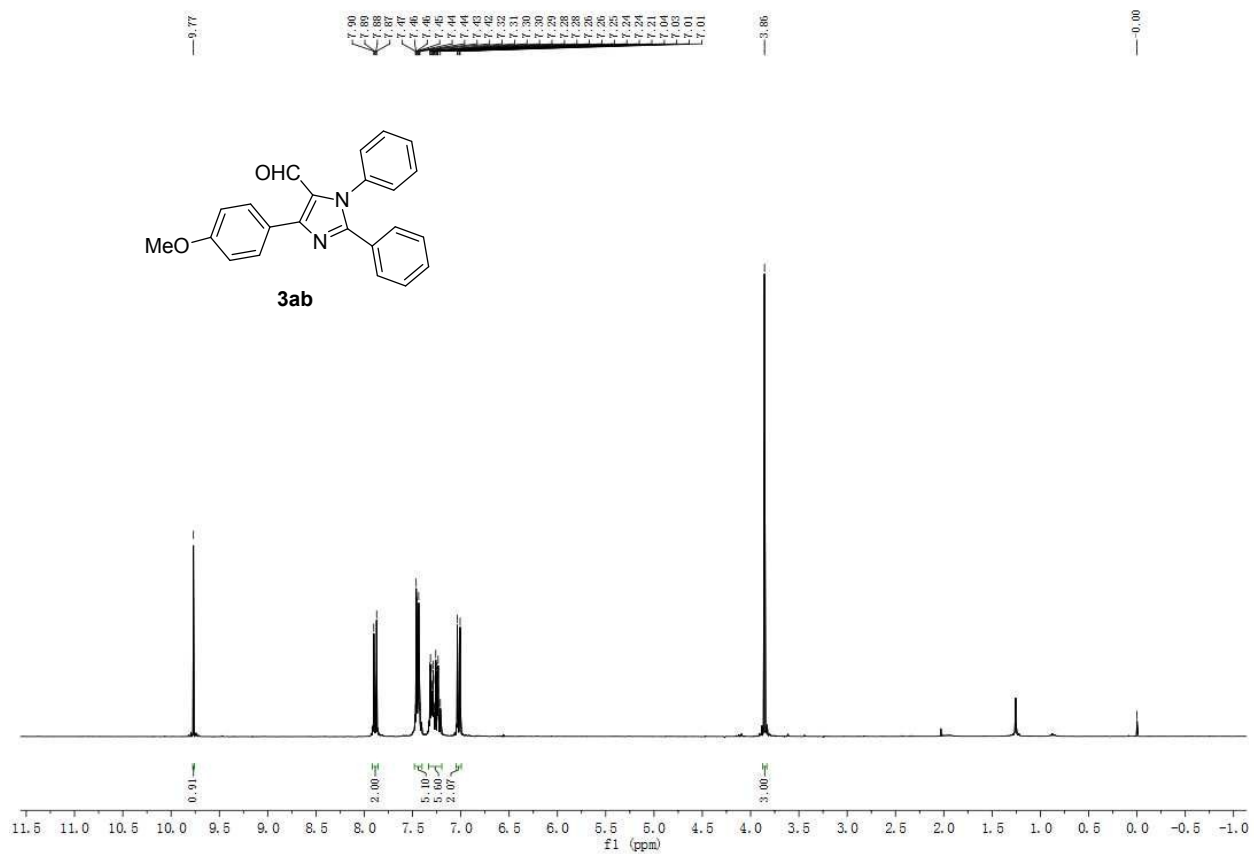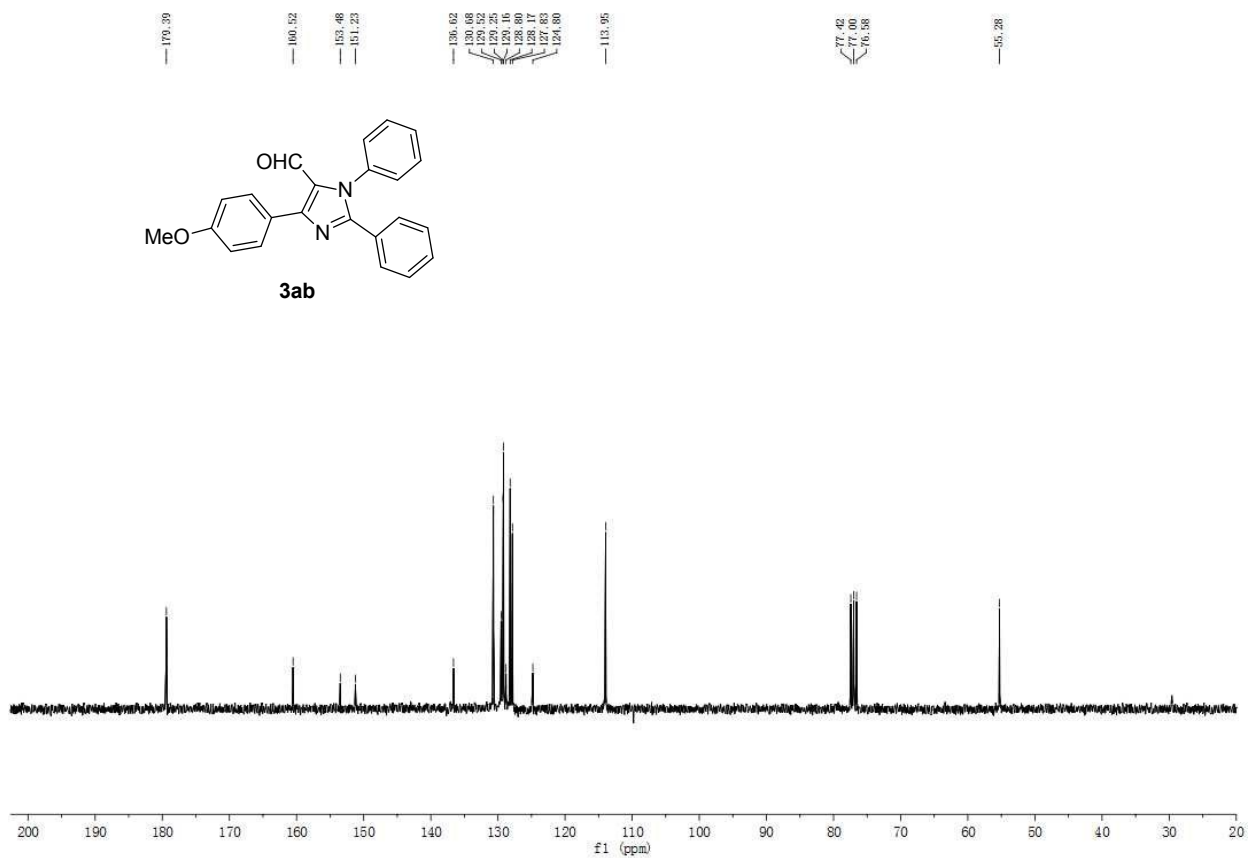

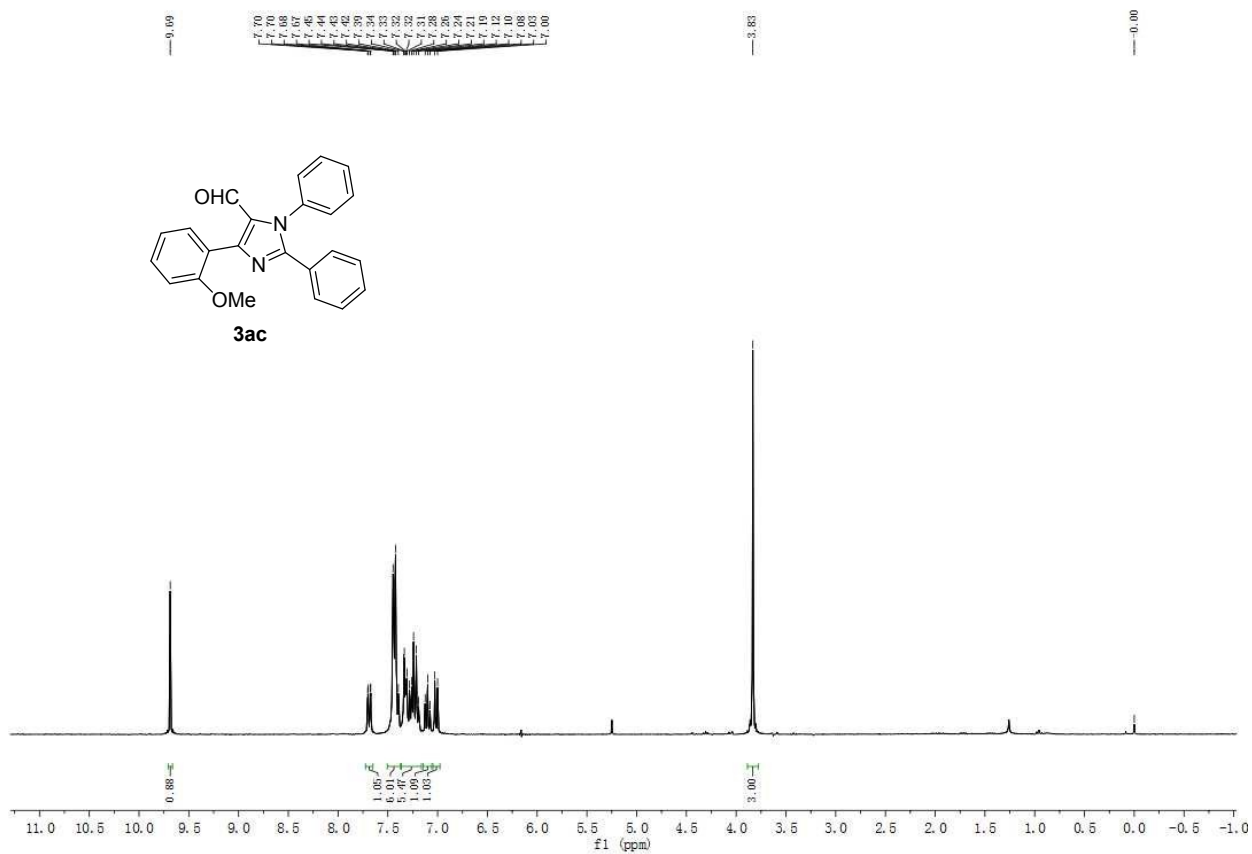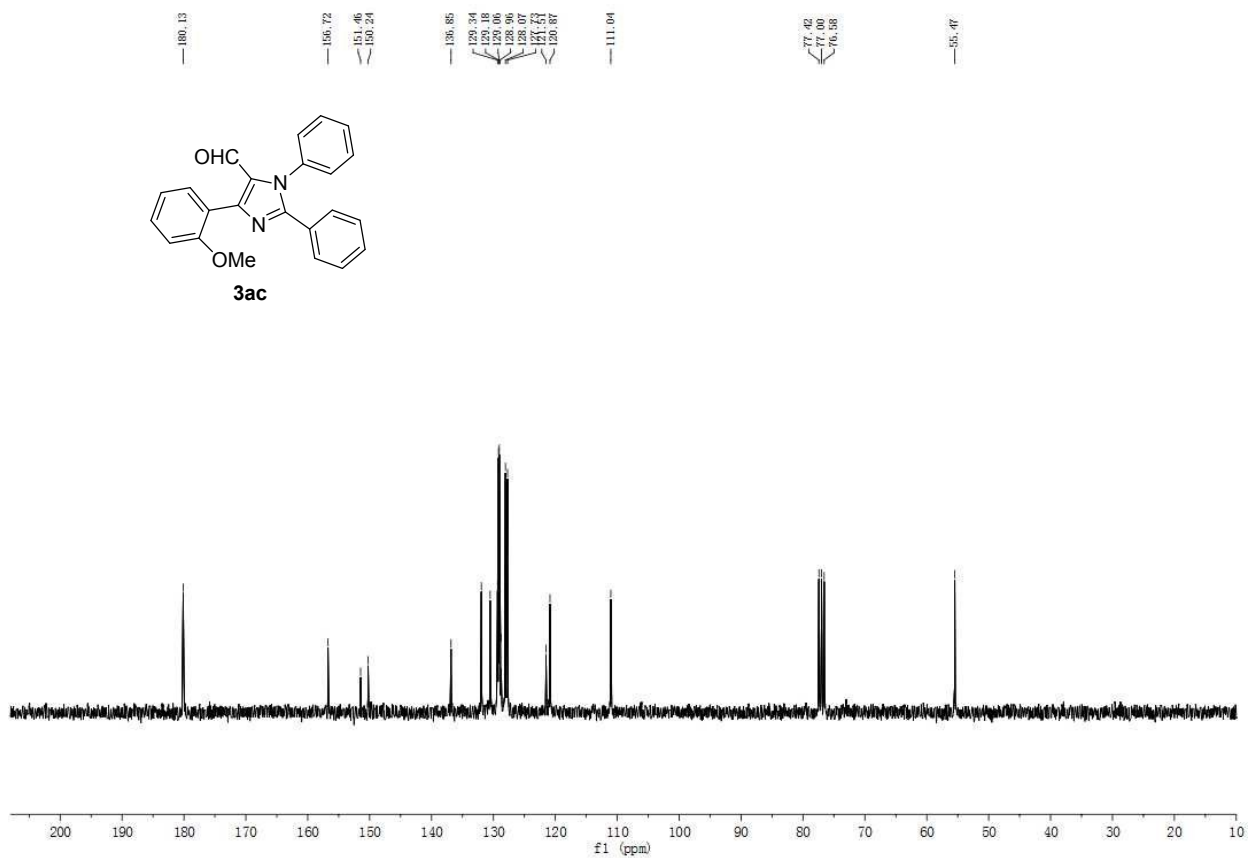

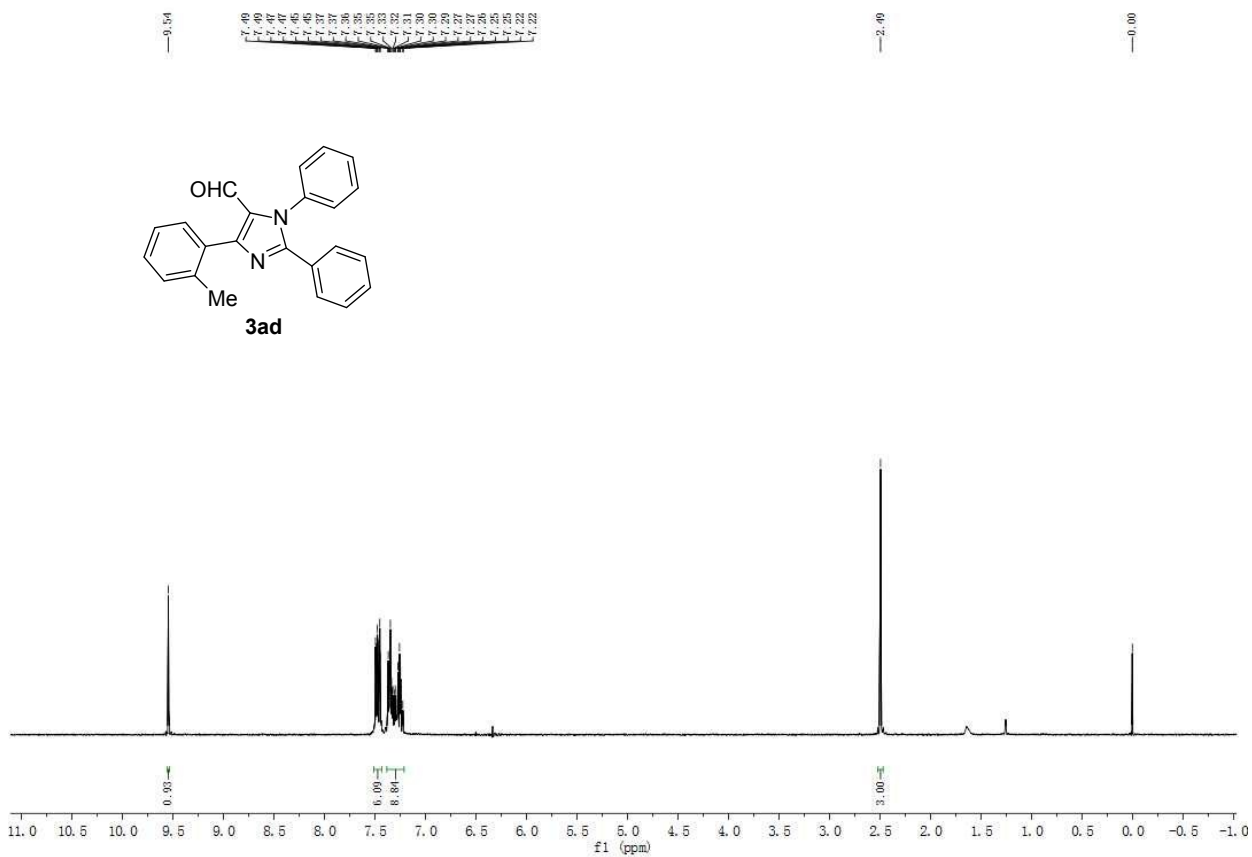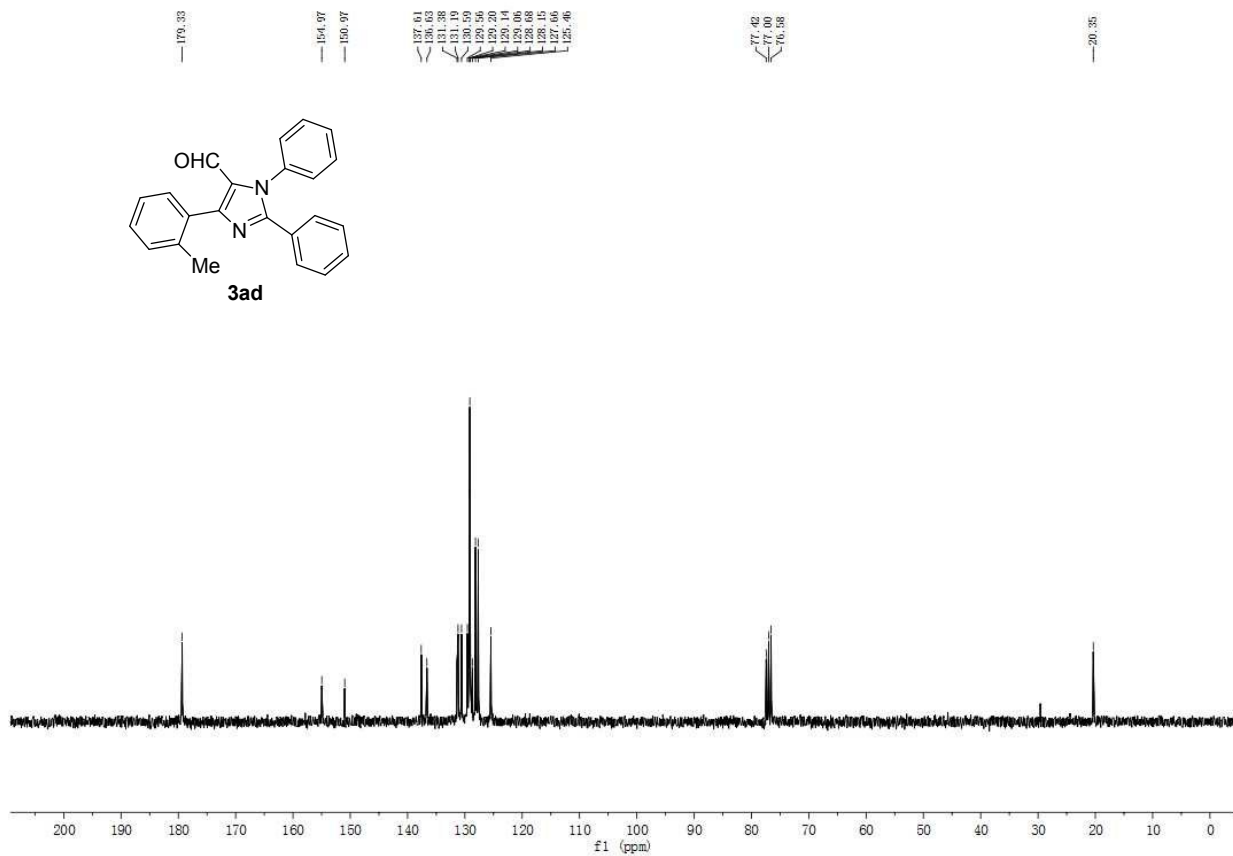

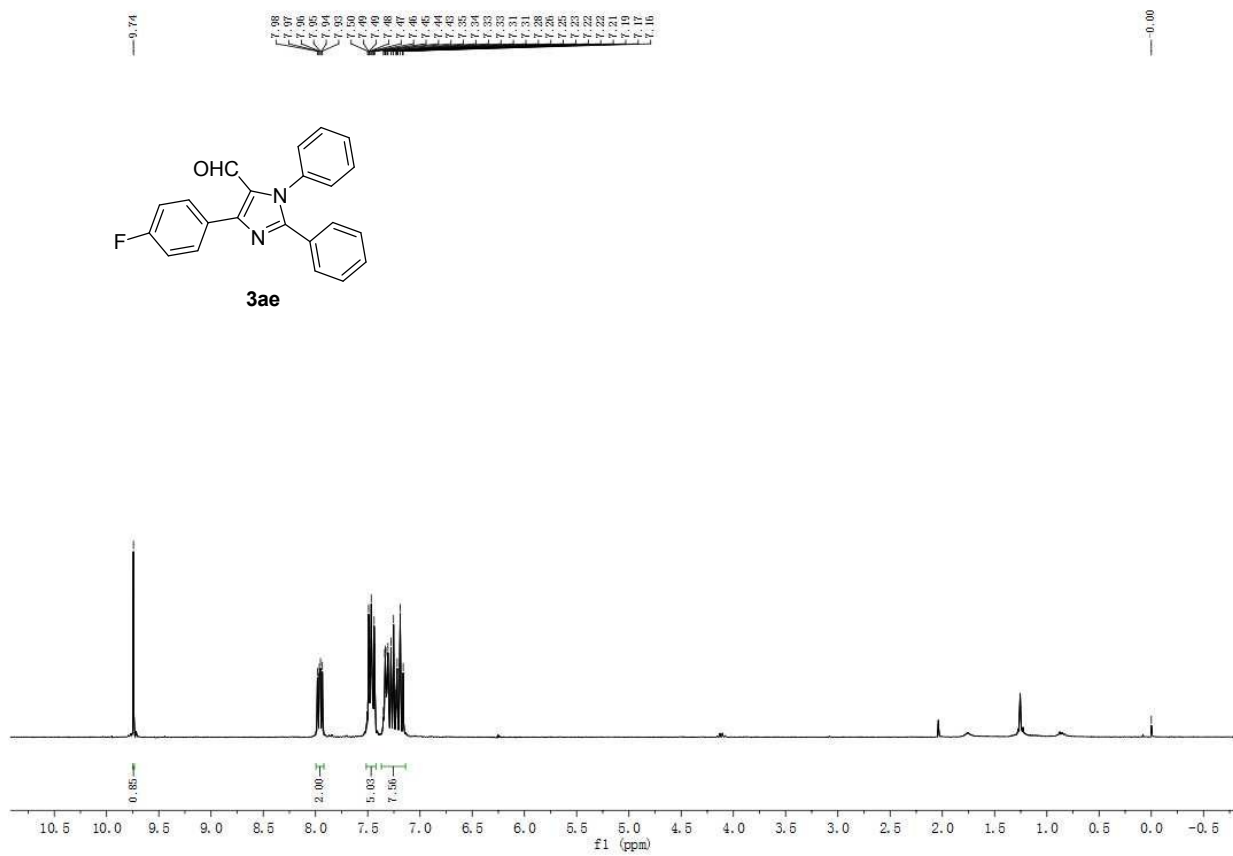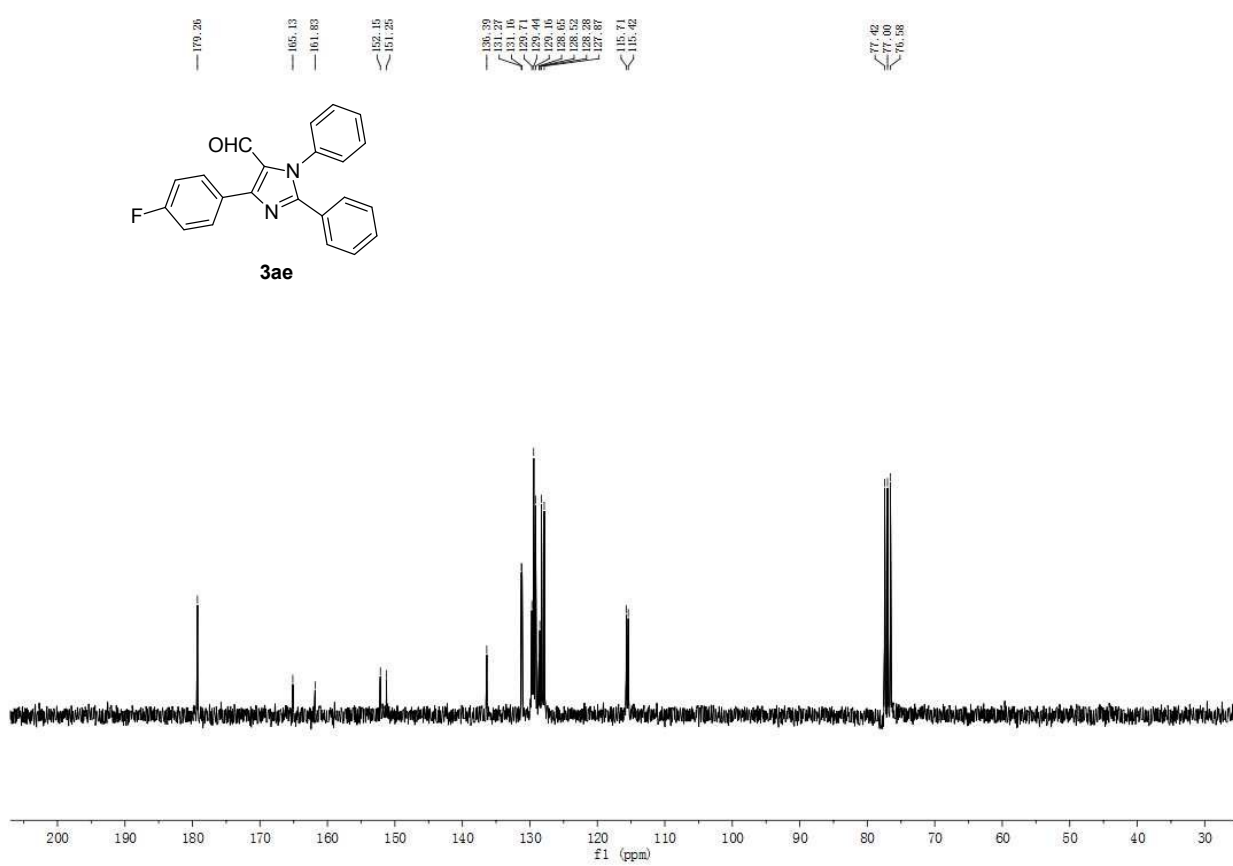

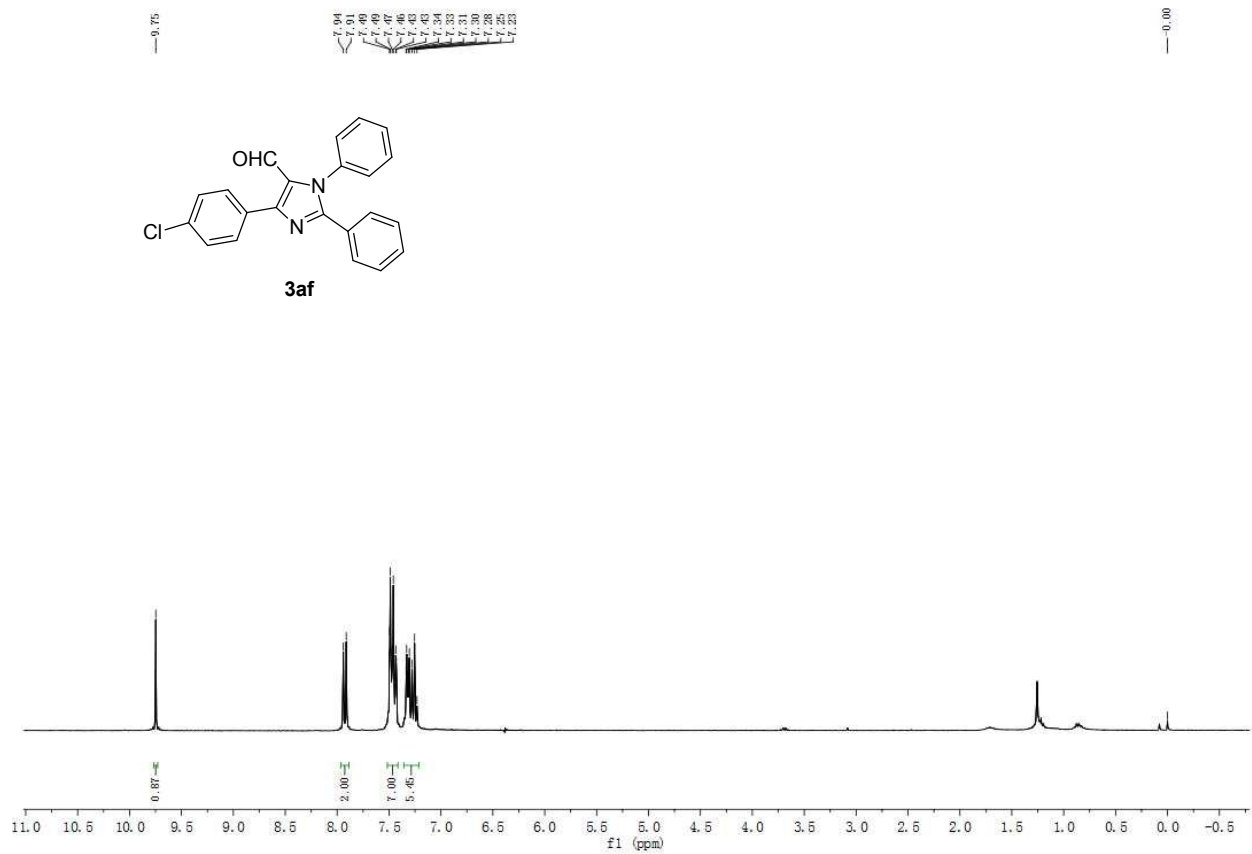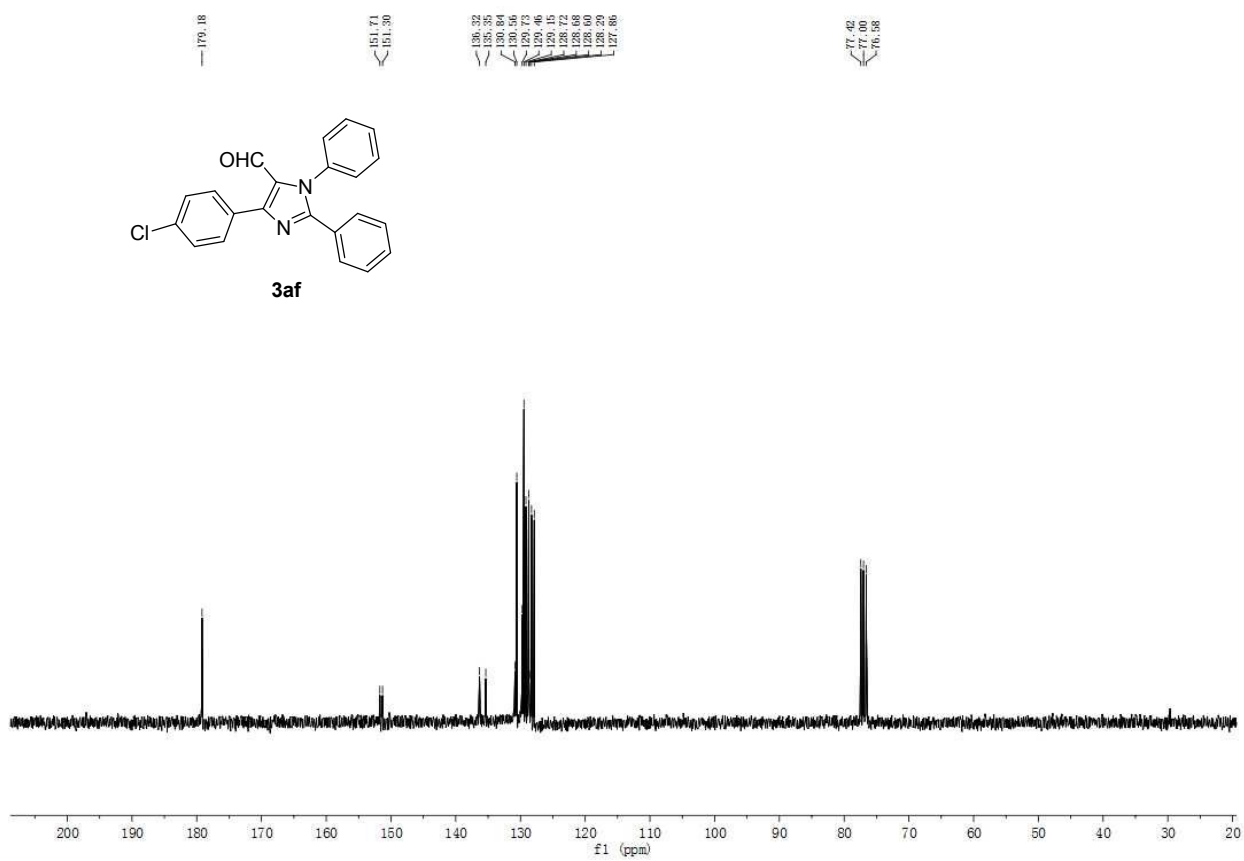



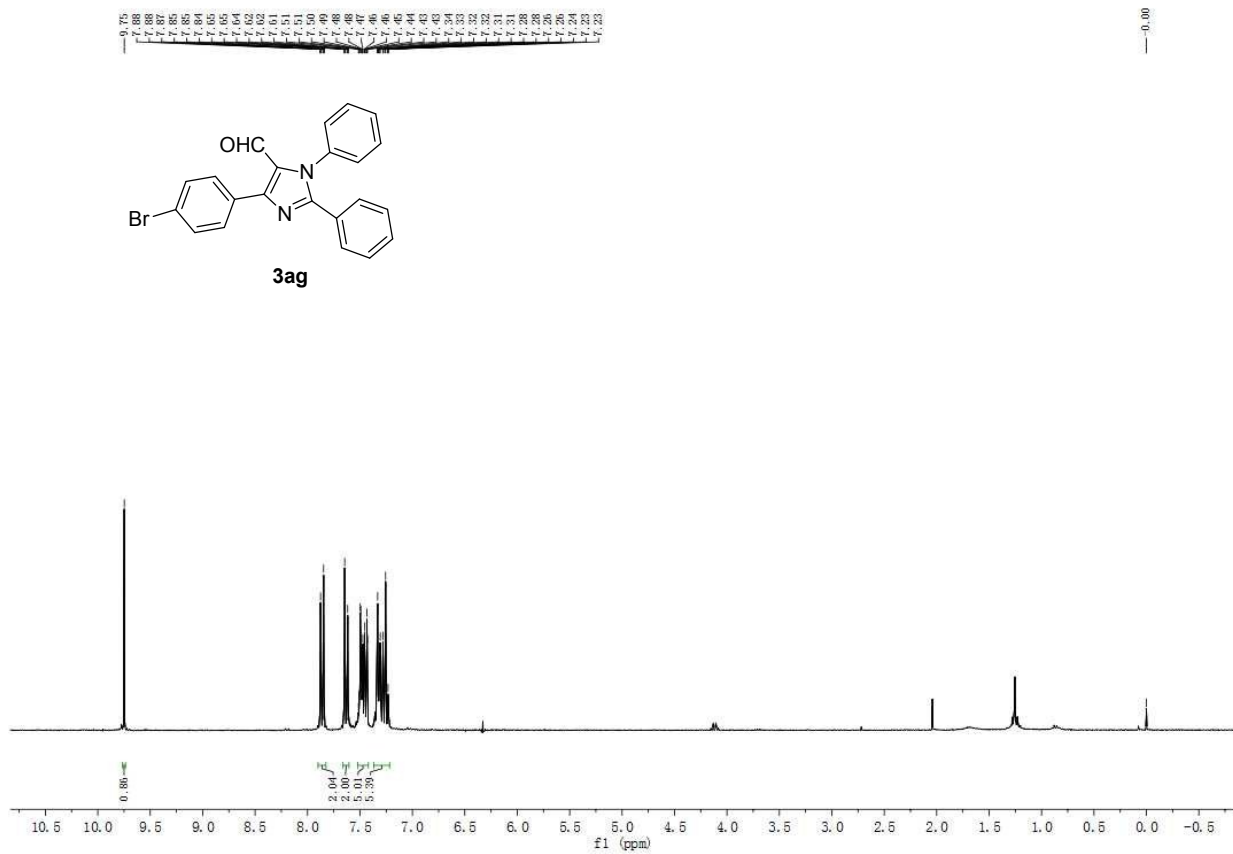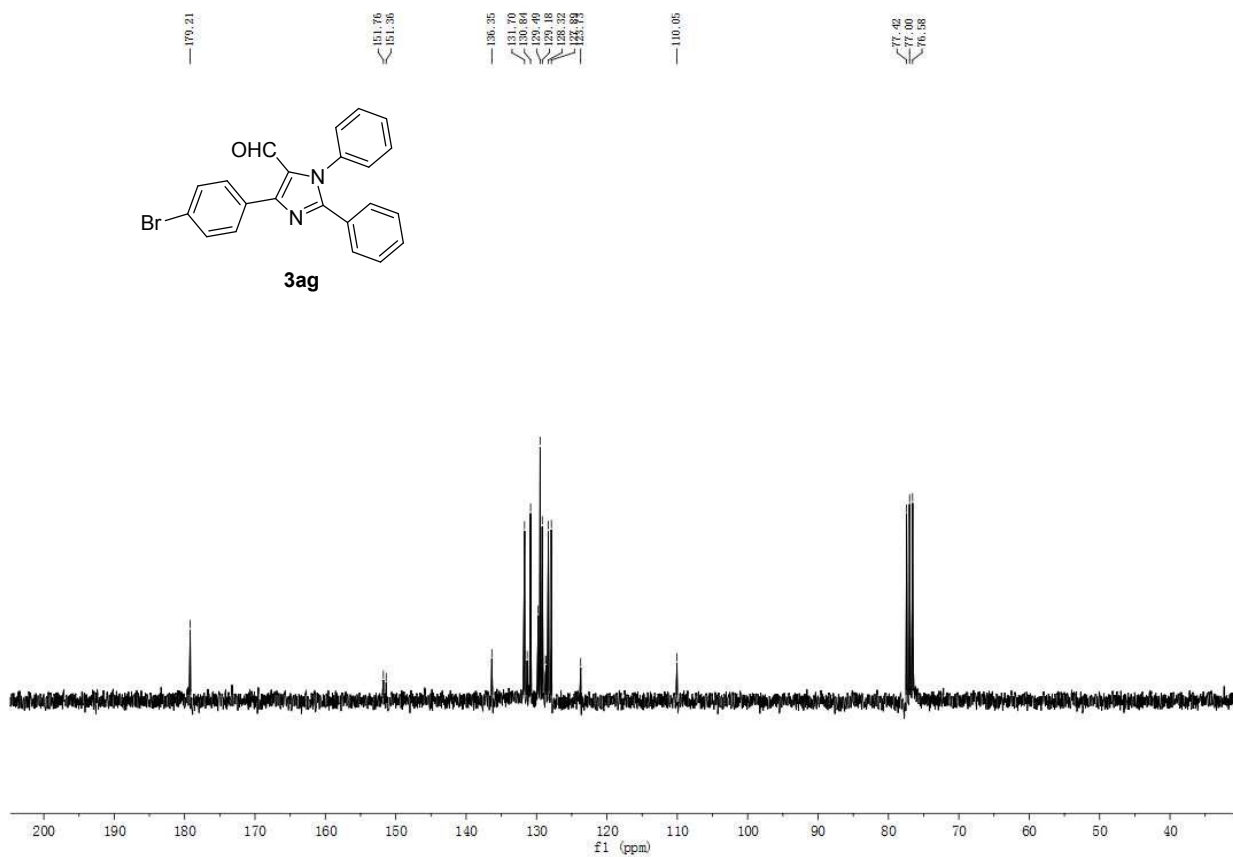

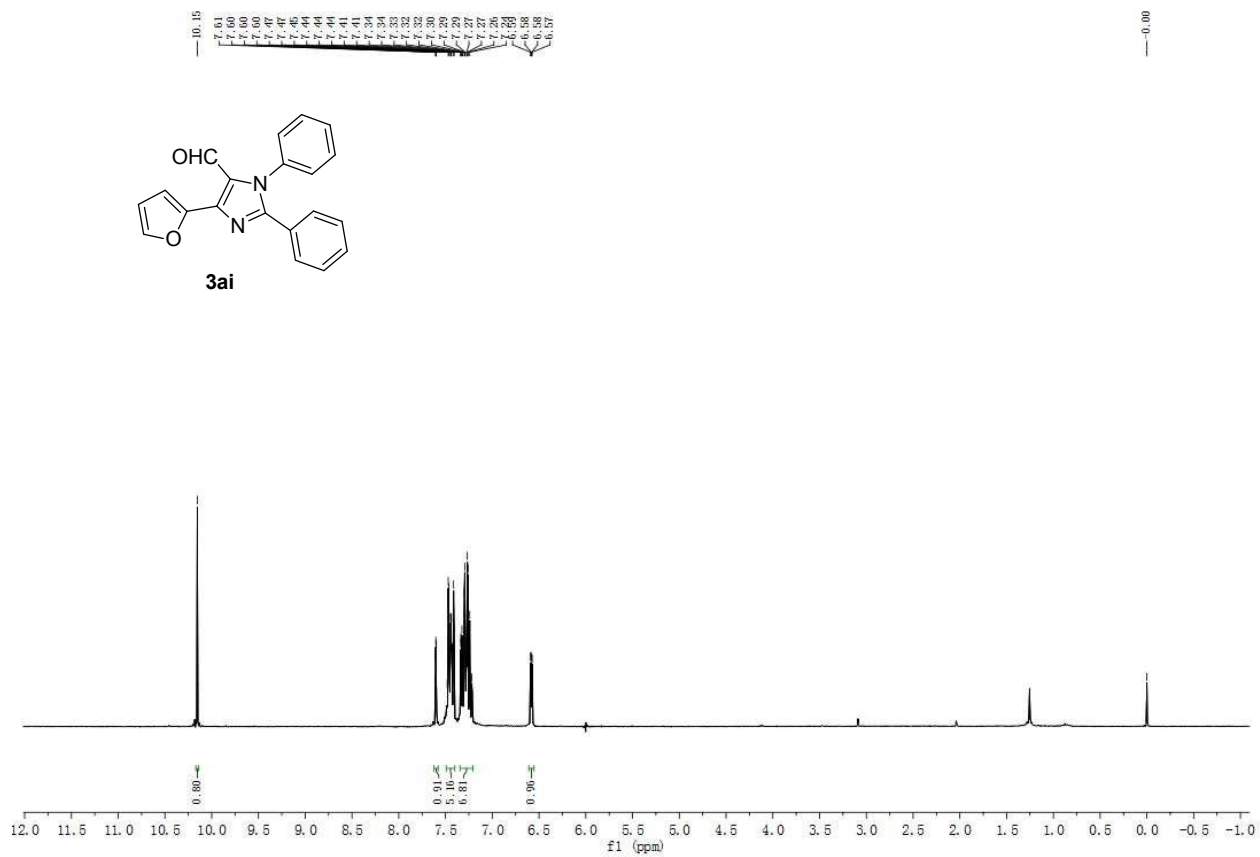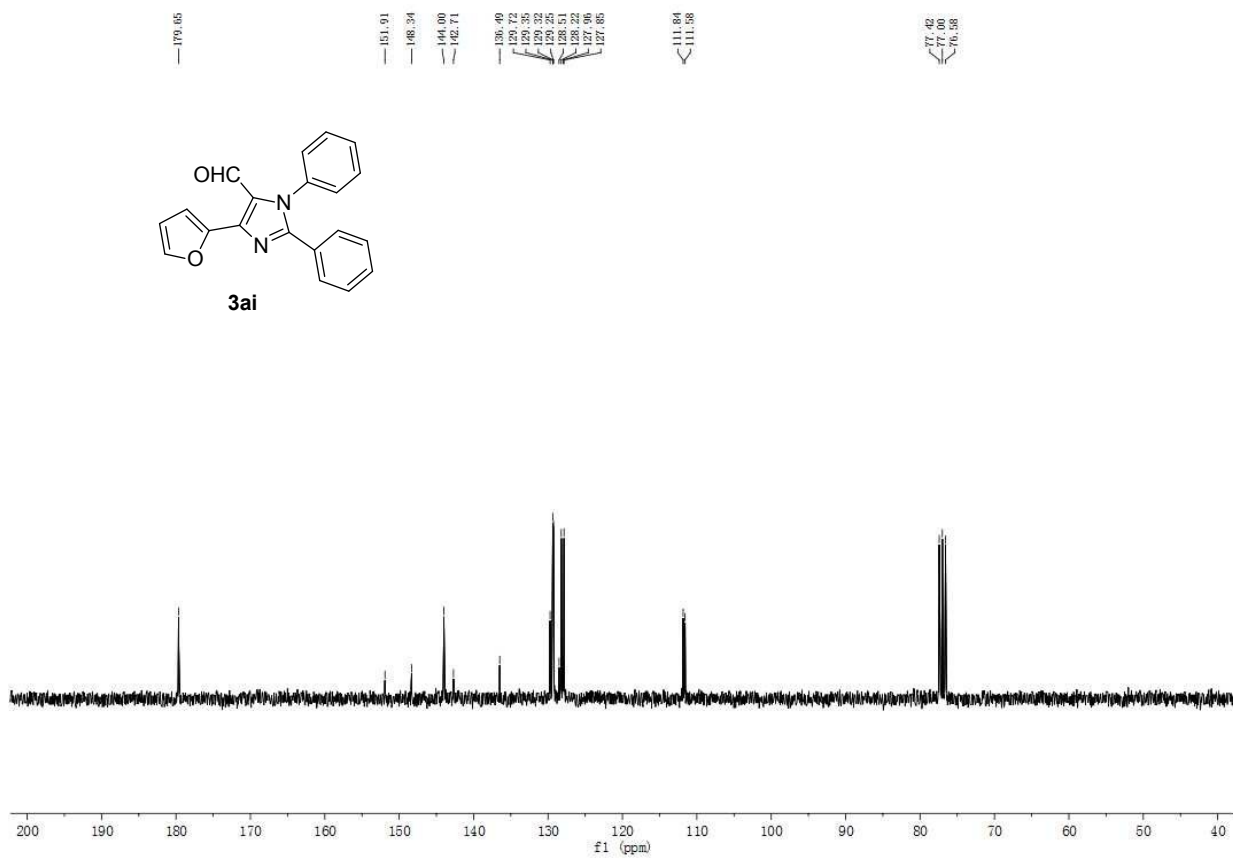

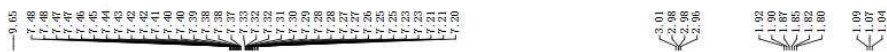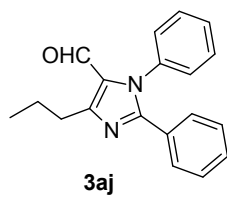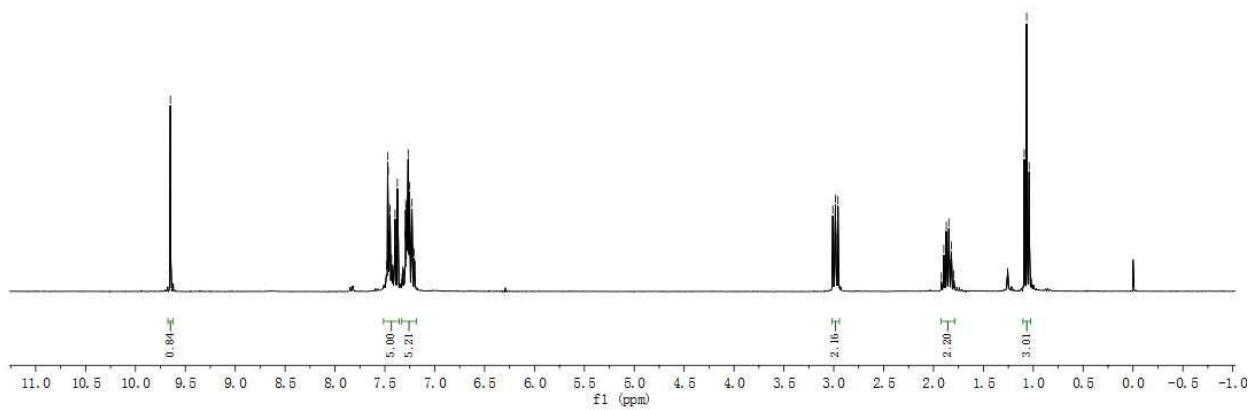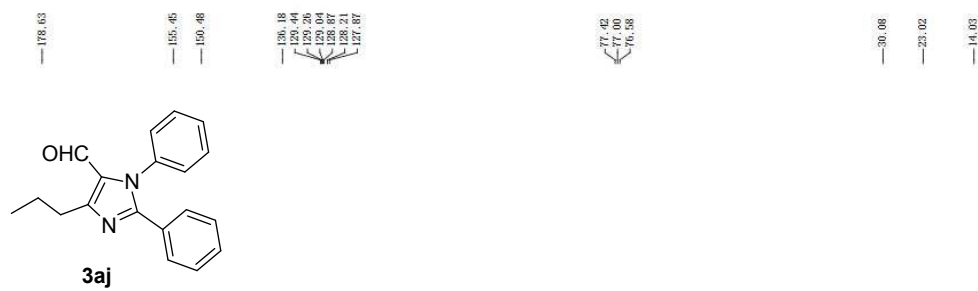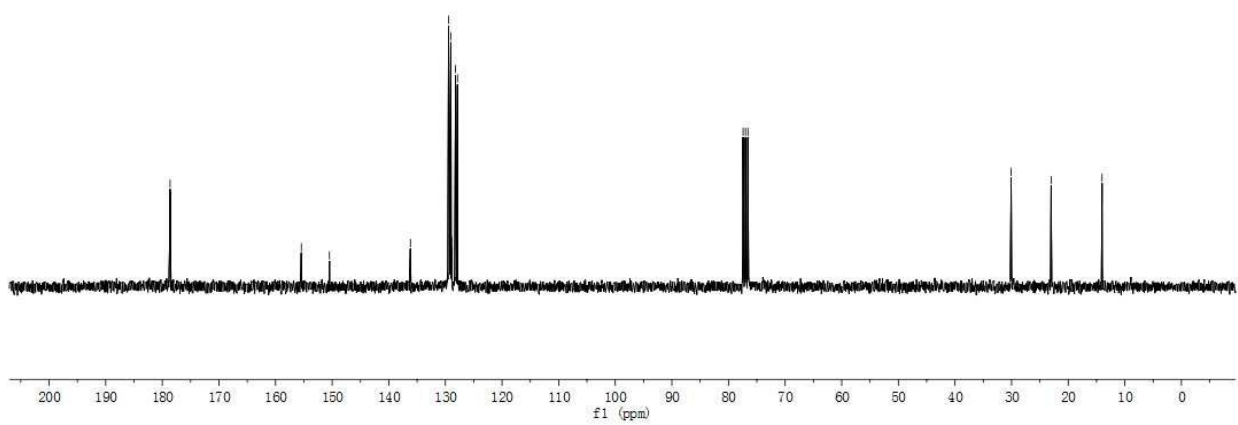

7.71  
7.68  
7.58  
7.50  
7.49  
7.48  
7.46  
7.44  
7.35  
7.34  
7.31  
7.29  
7.28  
7.27  
7.25  
7.25  
7.24  
7.22  
7.18  
7.15  
7.13  
7.12

-0.00

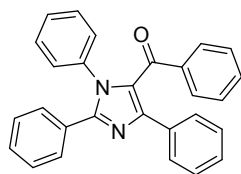

3ak

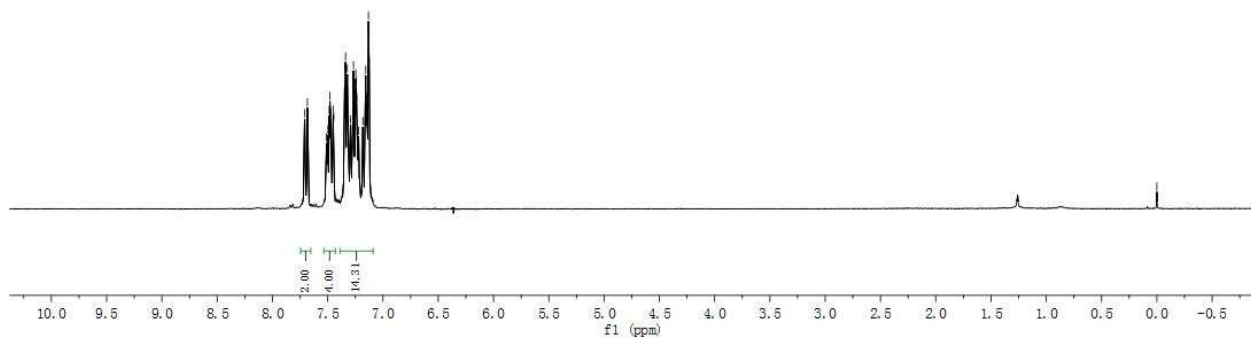

187.57

140.83  
136.49  
137.07  
133.26  
132.86  
129.77  
129.03  
129.07  
128.96  
128.91  
128.36  
128.13  
128.01  
127.92  
127.90

77.42  
77.00  
76.58

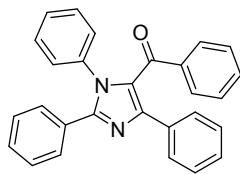

3ak

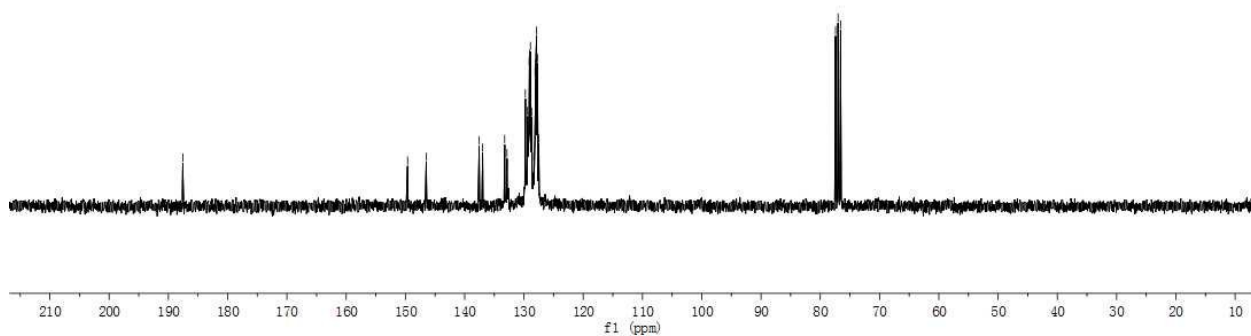

Supplement: c5qo00285k1.pdf [file c5qo00285k1.pdf]
